# Supplementary material for: Genetic Diversity and Primary Core Collection Construction of Turnip (Brassica rapa L. ssp. rapifera Matzg) Landraces in Tibet Revealed via Morphological and SSR Markers
Source: MDPI journal article supplement (doi:10.3390/agronomy11101901), 2021-09-22

**Figure S3.** Hierarchical cluster analysis of 118 turnip landraces from Tibet based on morphological traits. I = group 1; II = group 2.

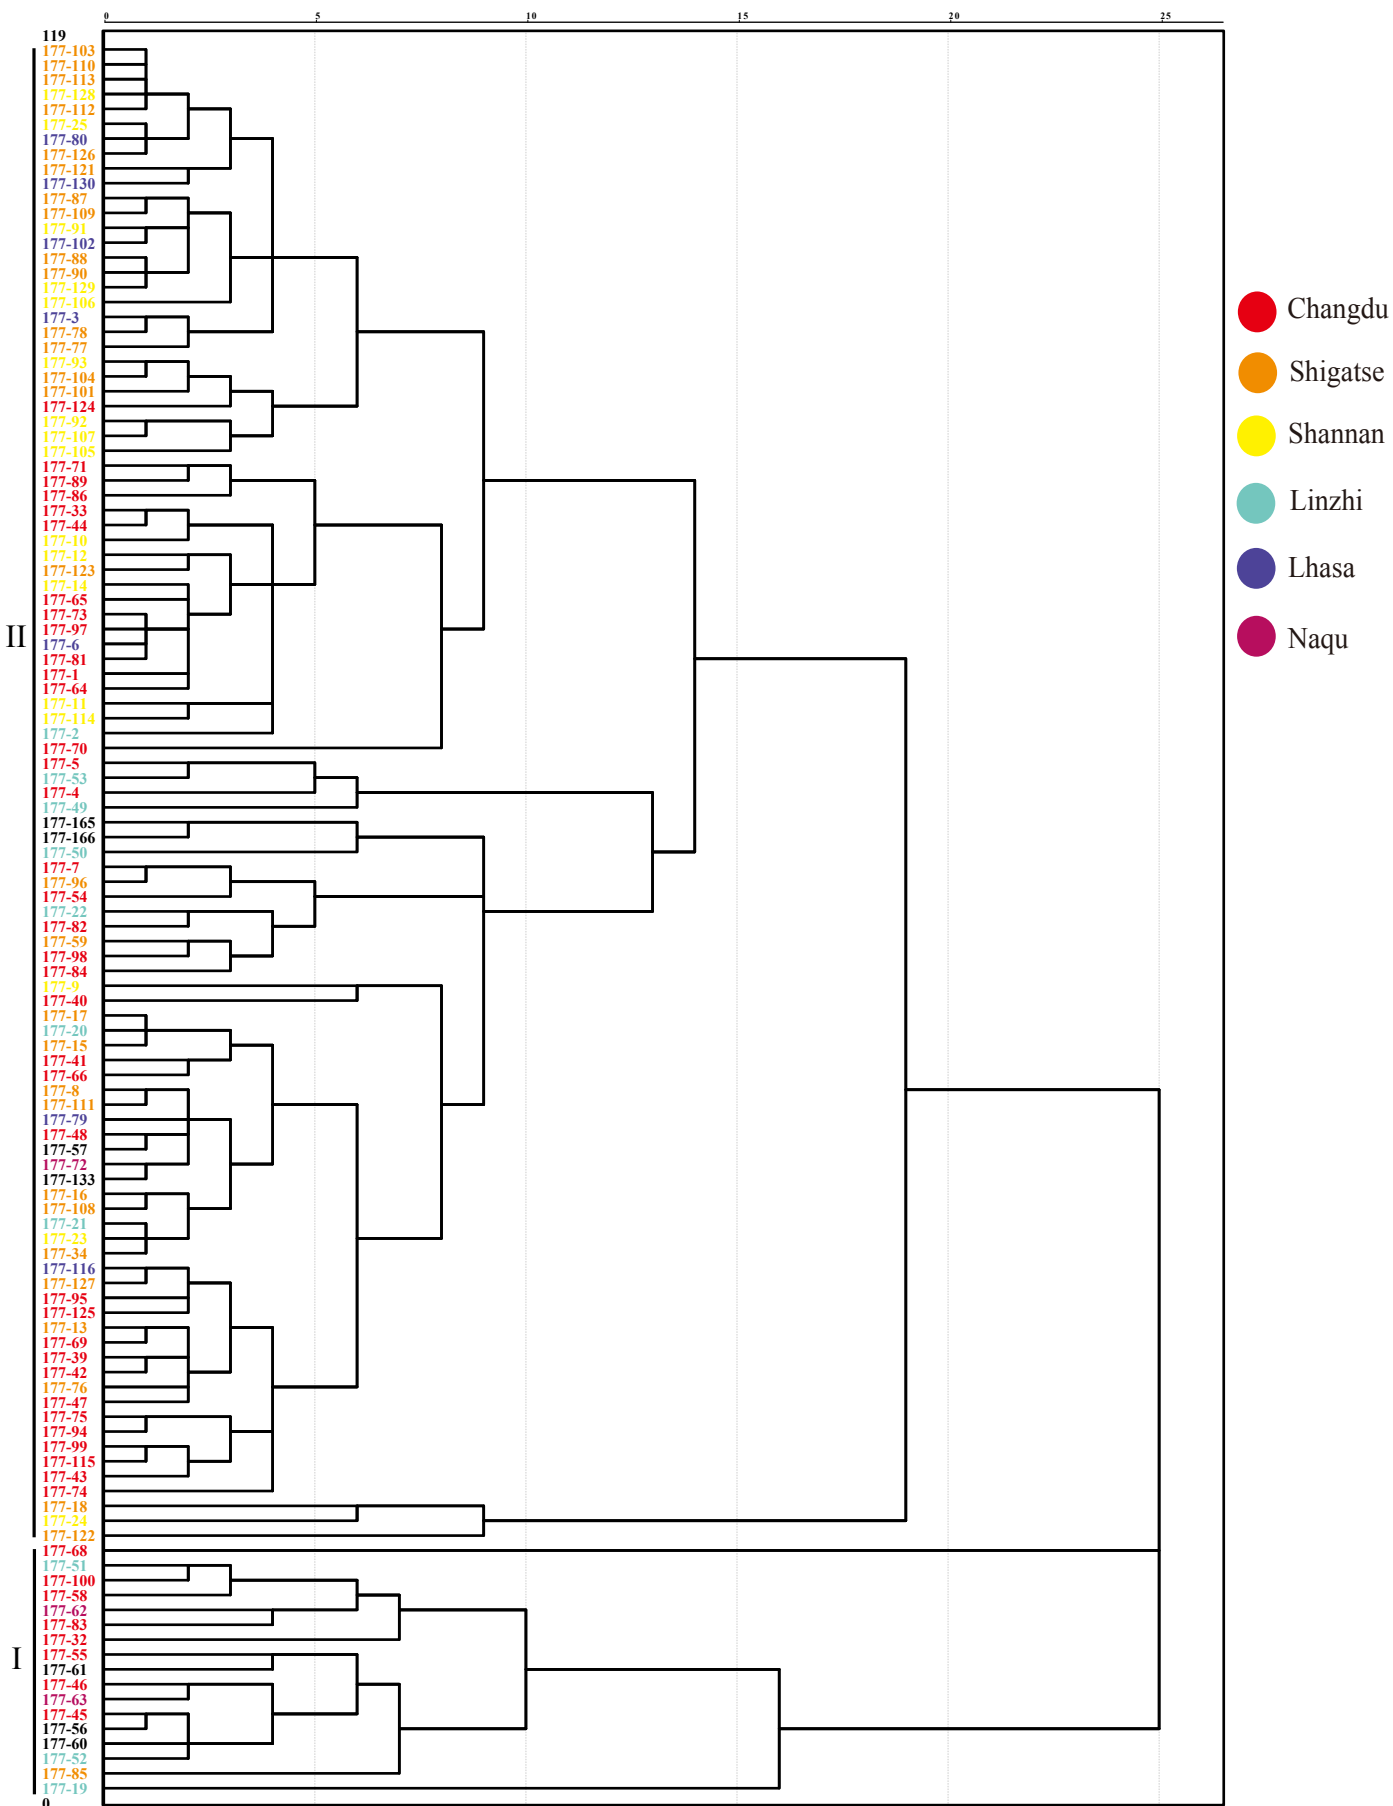

Supplement: s1 [file s1]
