# Supplementary material for: Genetic Diversity and Primary Core Collection Construction of Turnip (Brassica rapa L. ssp. rapifera Matzg) Landraces in Tibet Revealed via Morphological and SSR Markers
Source: MDPI journal article supplement (doi:10.3390/agronomy11101901), 2021-09-22
Supplement: s1 [file s1]

Archive with 20 entries (20 files):
- Figure S1.pdf
- Figure S10.pdf
- Figure S2.pdf
- Figure S3.pdf
- Figure S4.pdf
- Figure S5.pdf
- Figure S6.pdf
- Figure S7.pdf
- Figure S8.pdf
- Figure S9.pdf
- Table S1.xlsx
- Table S10.xlsx
- Table S2.xlsx
- Table S3.xlsx
- Table S4.xlsx
- Table S5.xlsx
- Table S6.xlsx
- Table S7.xlsx
- Table S8.xlsx
- Table S9..xlsx
