# Supplementary material for: Genetic Diversity and Primary Core Collection Construction of Turnip (Brassica rapa L. ssp. rapifera Matzg) Landraces in Tibet Revealed via Morphological and SSR Markers
Source: MDPI journal article supplement (doi:10.3390/agronomy11101901), 2021-09-22

**Figure S6.** Geographical origin location of landraces from Tibet by cluster analysis based on SSR markers.  
A: The geographic origin location of 118 landraces according to the clustering. B: The geographical location of Tibet Province in China.

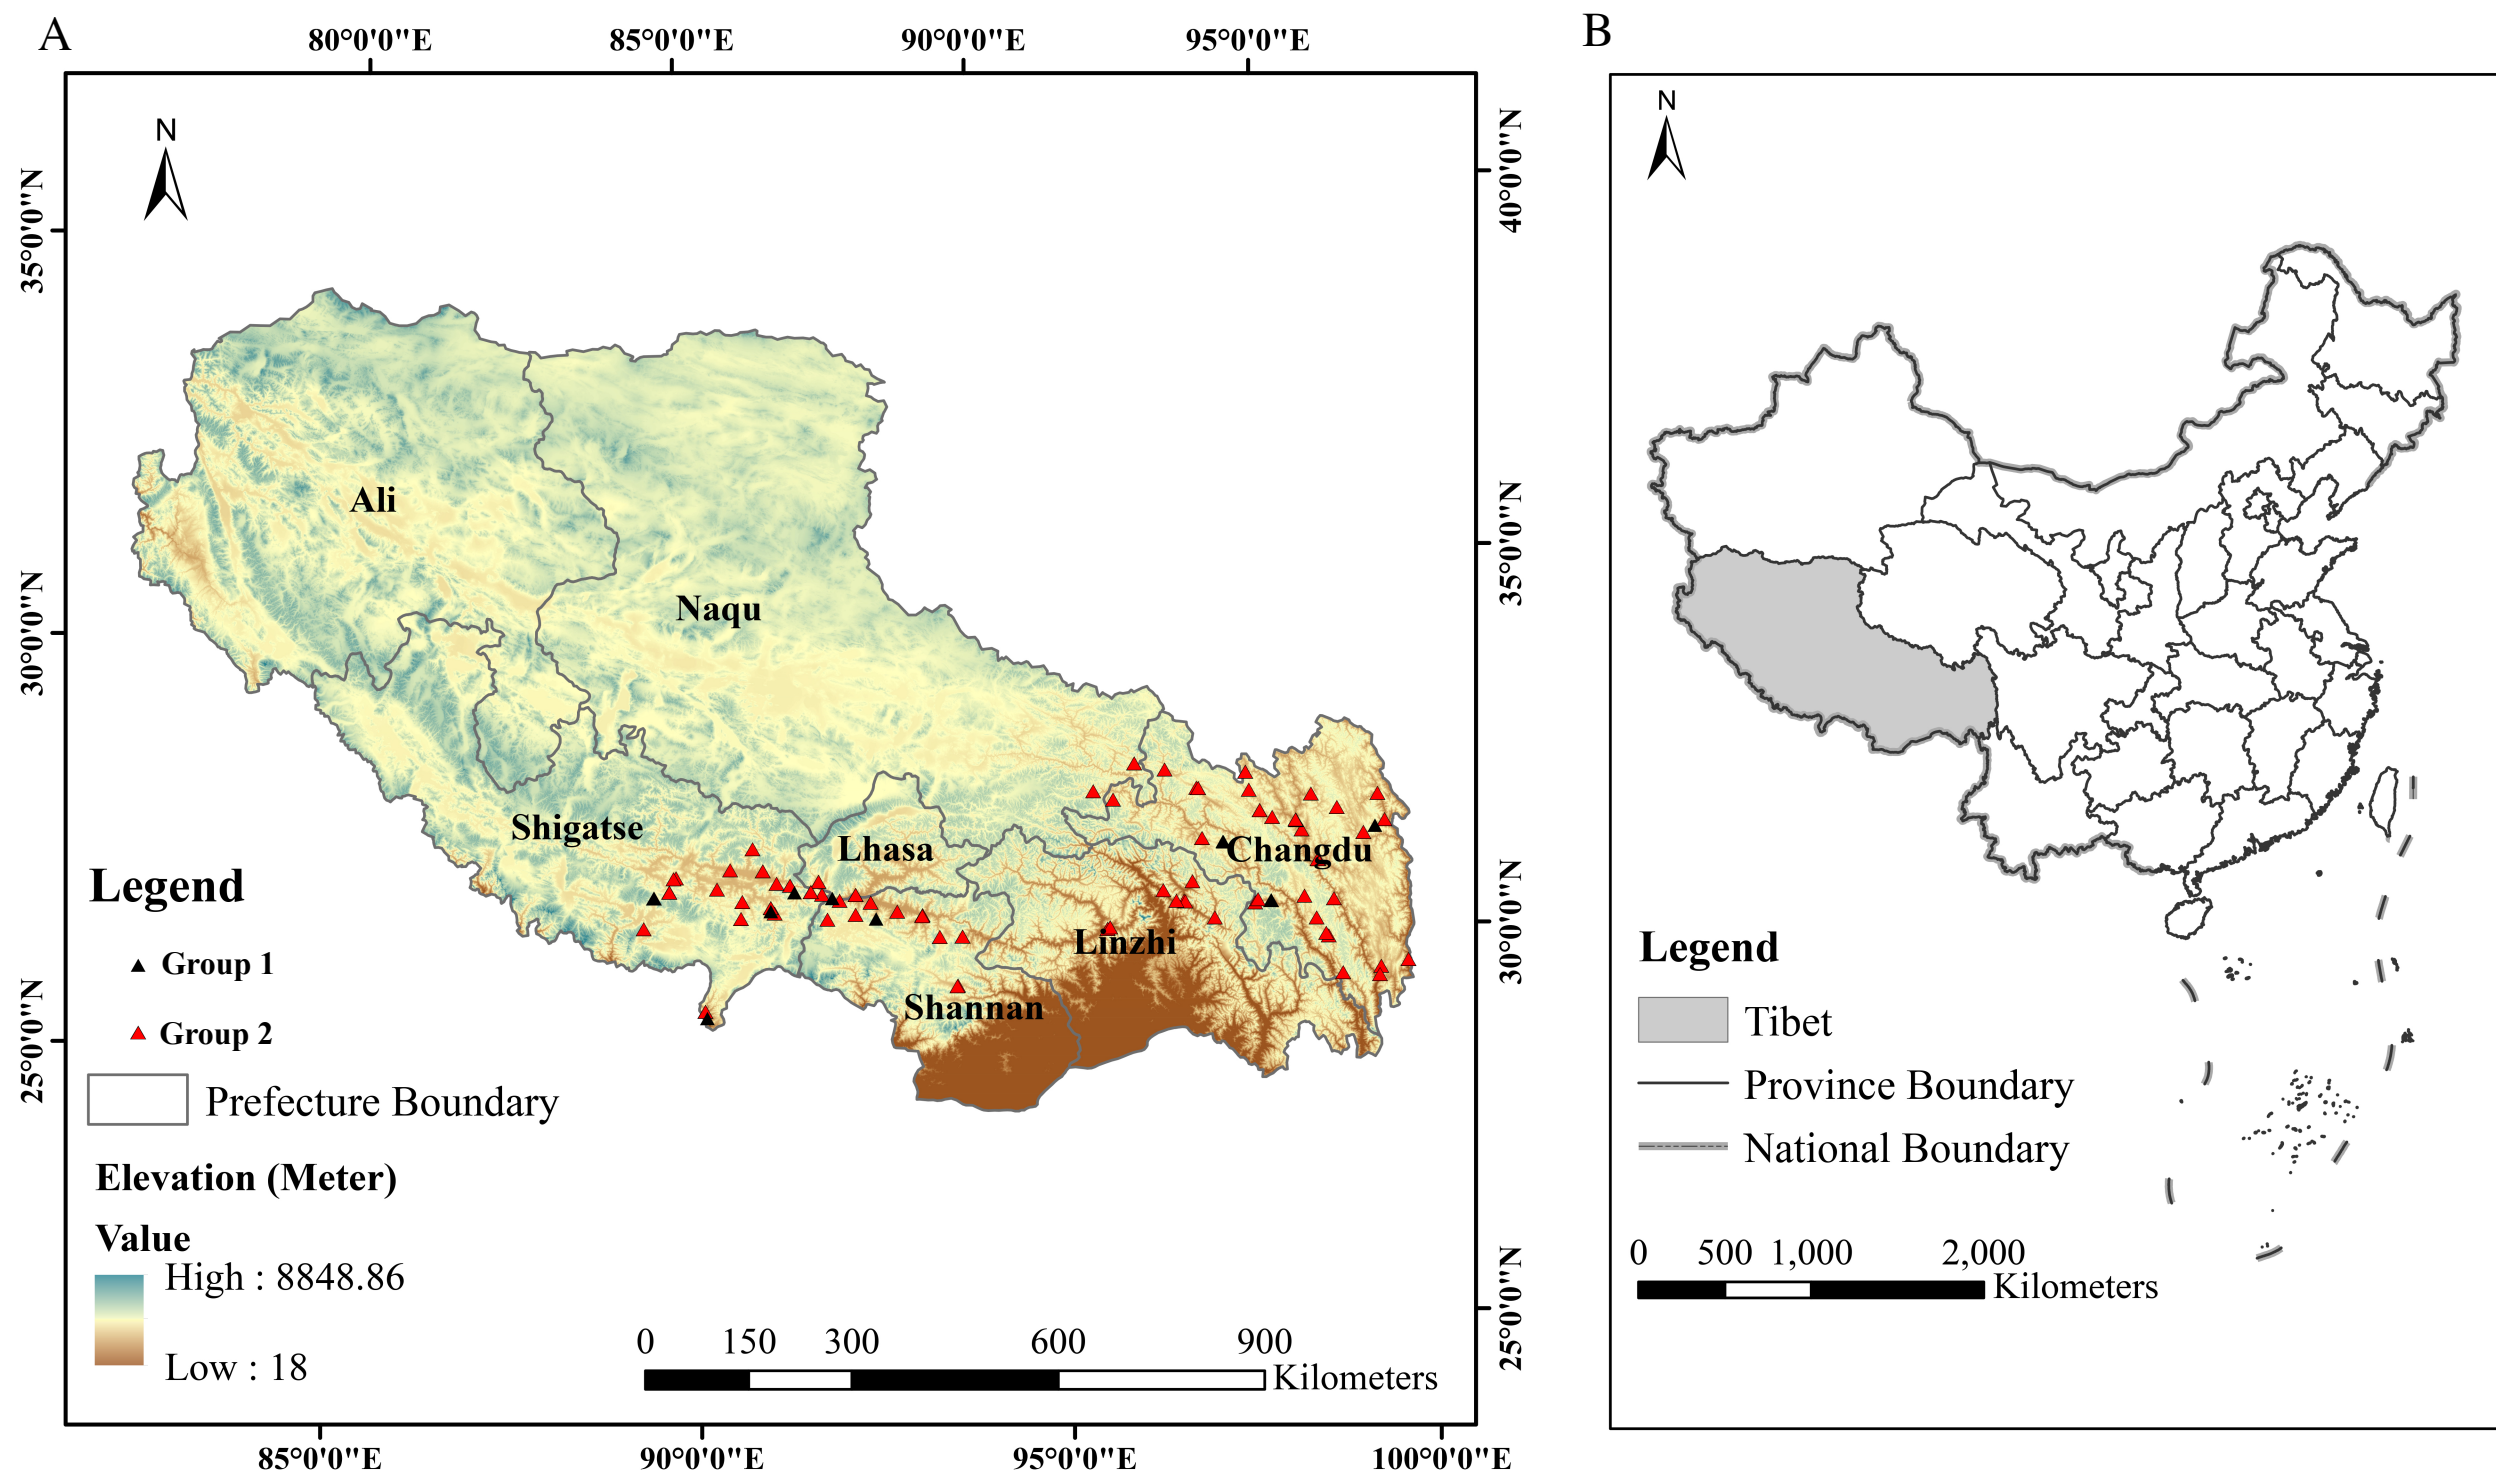

Supplement: s1 [file s1]
