# Supplementary material for: Genetic Diversity and Primary Core Collection Construction of Turnip (Brassica rapa L. ssp. rapifera Matzg) Landraces in Tibet Revealed via Morphological and SSR Markers
Source: MDPI journal article supplement (doi:10.3390/agronomy11101901), 2021-09-22

**Figure S9.** Population structure of 118 Tibetan turnip landraces based on SSR analysis. Codes (177-01~177-171) for varieties found in Table S1. a: Estimation of the optimum number of groups (K). The sharp peak of  $\Delta K$  at  $K = 2$  suggests two subpopulations. b: Graph for the parameter  $\ln P(D)$  and number of (K). c: Population structure when  $K = 2$ . d: Population structure when  $K = 3$ . The proportion of each color indicates the probability of each variety being divided into the corresponding group.

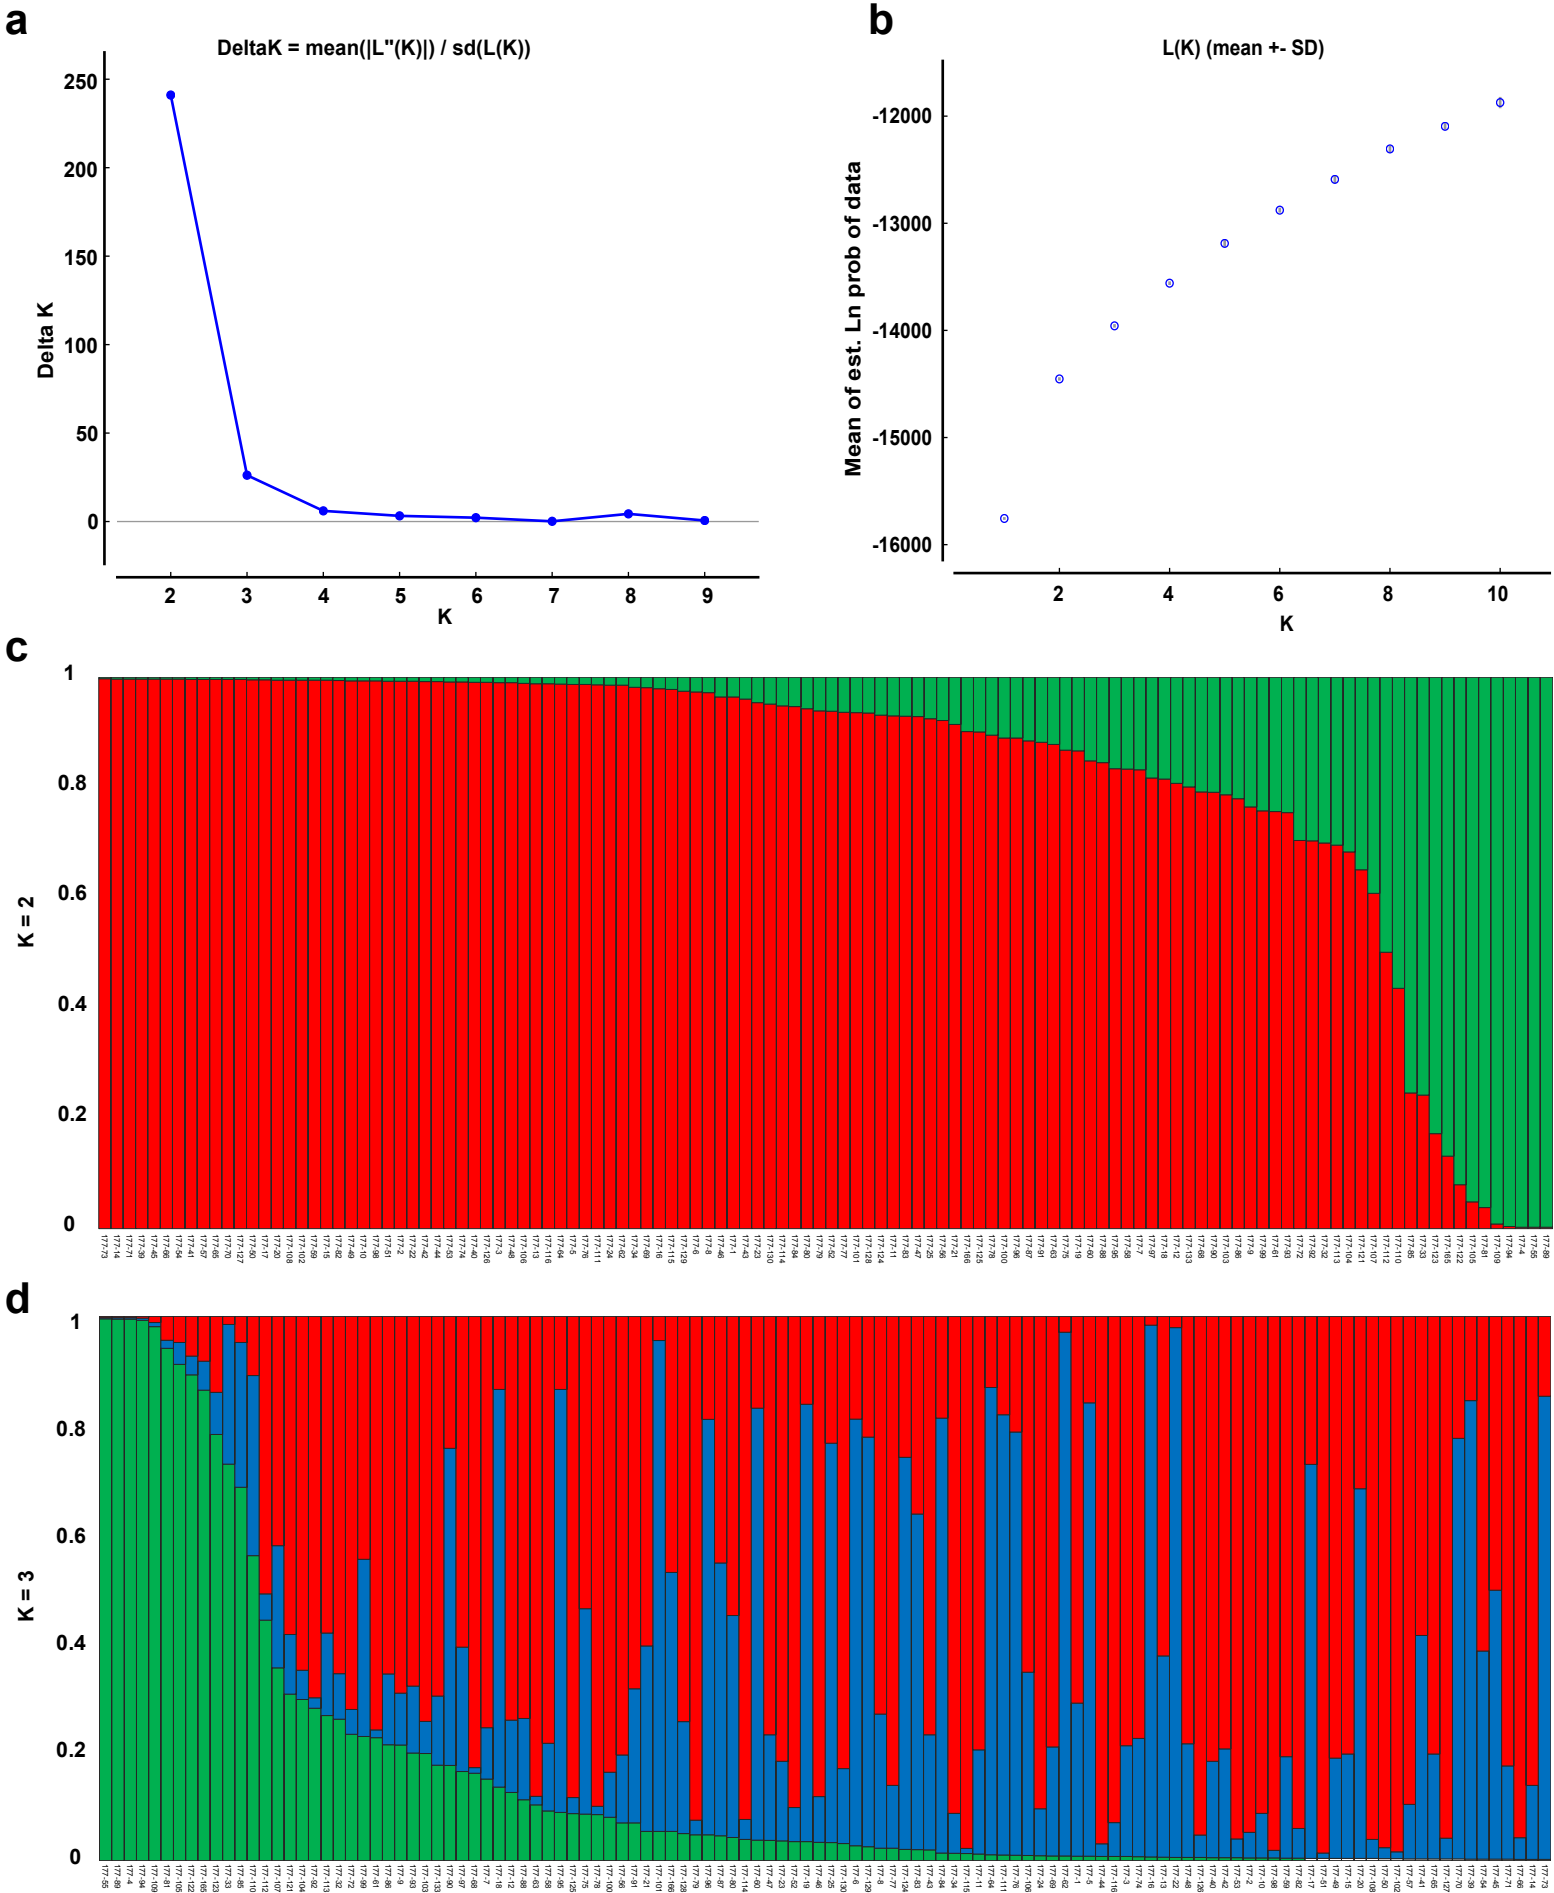

Supplement: s1 [file s1]
