# Supplementary material for: Genetic Diversity and Primary Core Collection Construction of Turnip (Brassica rapa L. ssp. rapifera Matzg) Landraces in Tibet Revealed via Morphological and SSR Markers
Source: MDPI journal article supplement (doi:10.3390/agronomy11101901), 2021-09-22

**Figure S4.** Dendrogram by cluster analysis of 171 turnip varieties based on SSR markers.I = group 1; II = group 2. Cophenetic correlation values between the original matrices and the cophenetic matrices given by the UPGMA clustering process showed  $r = 0.65, t = 18.14, p = 1.00$

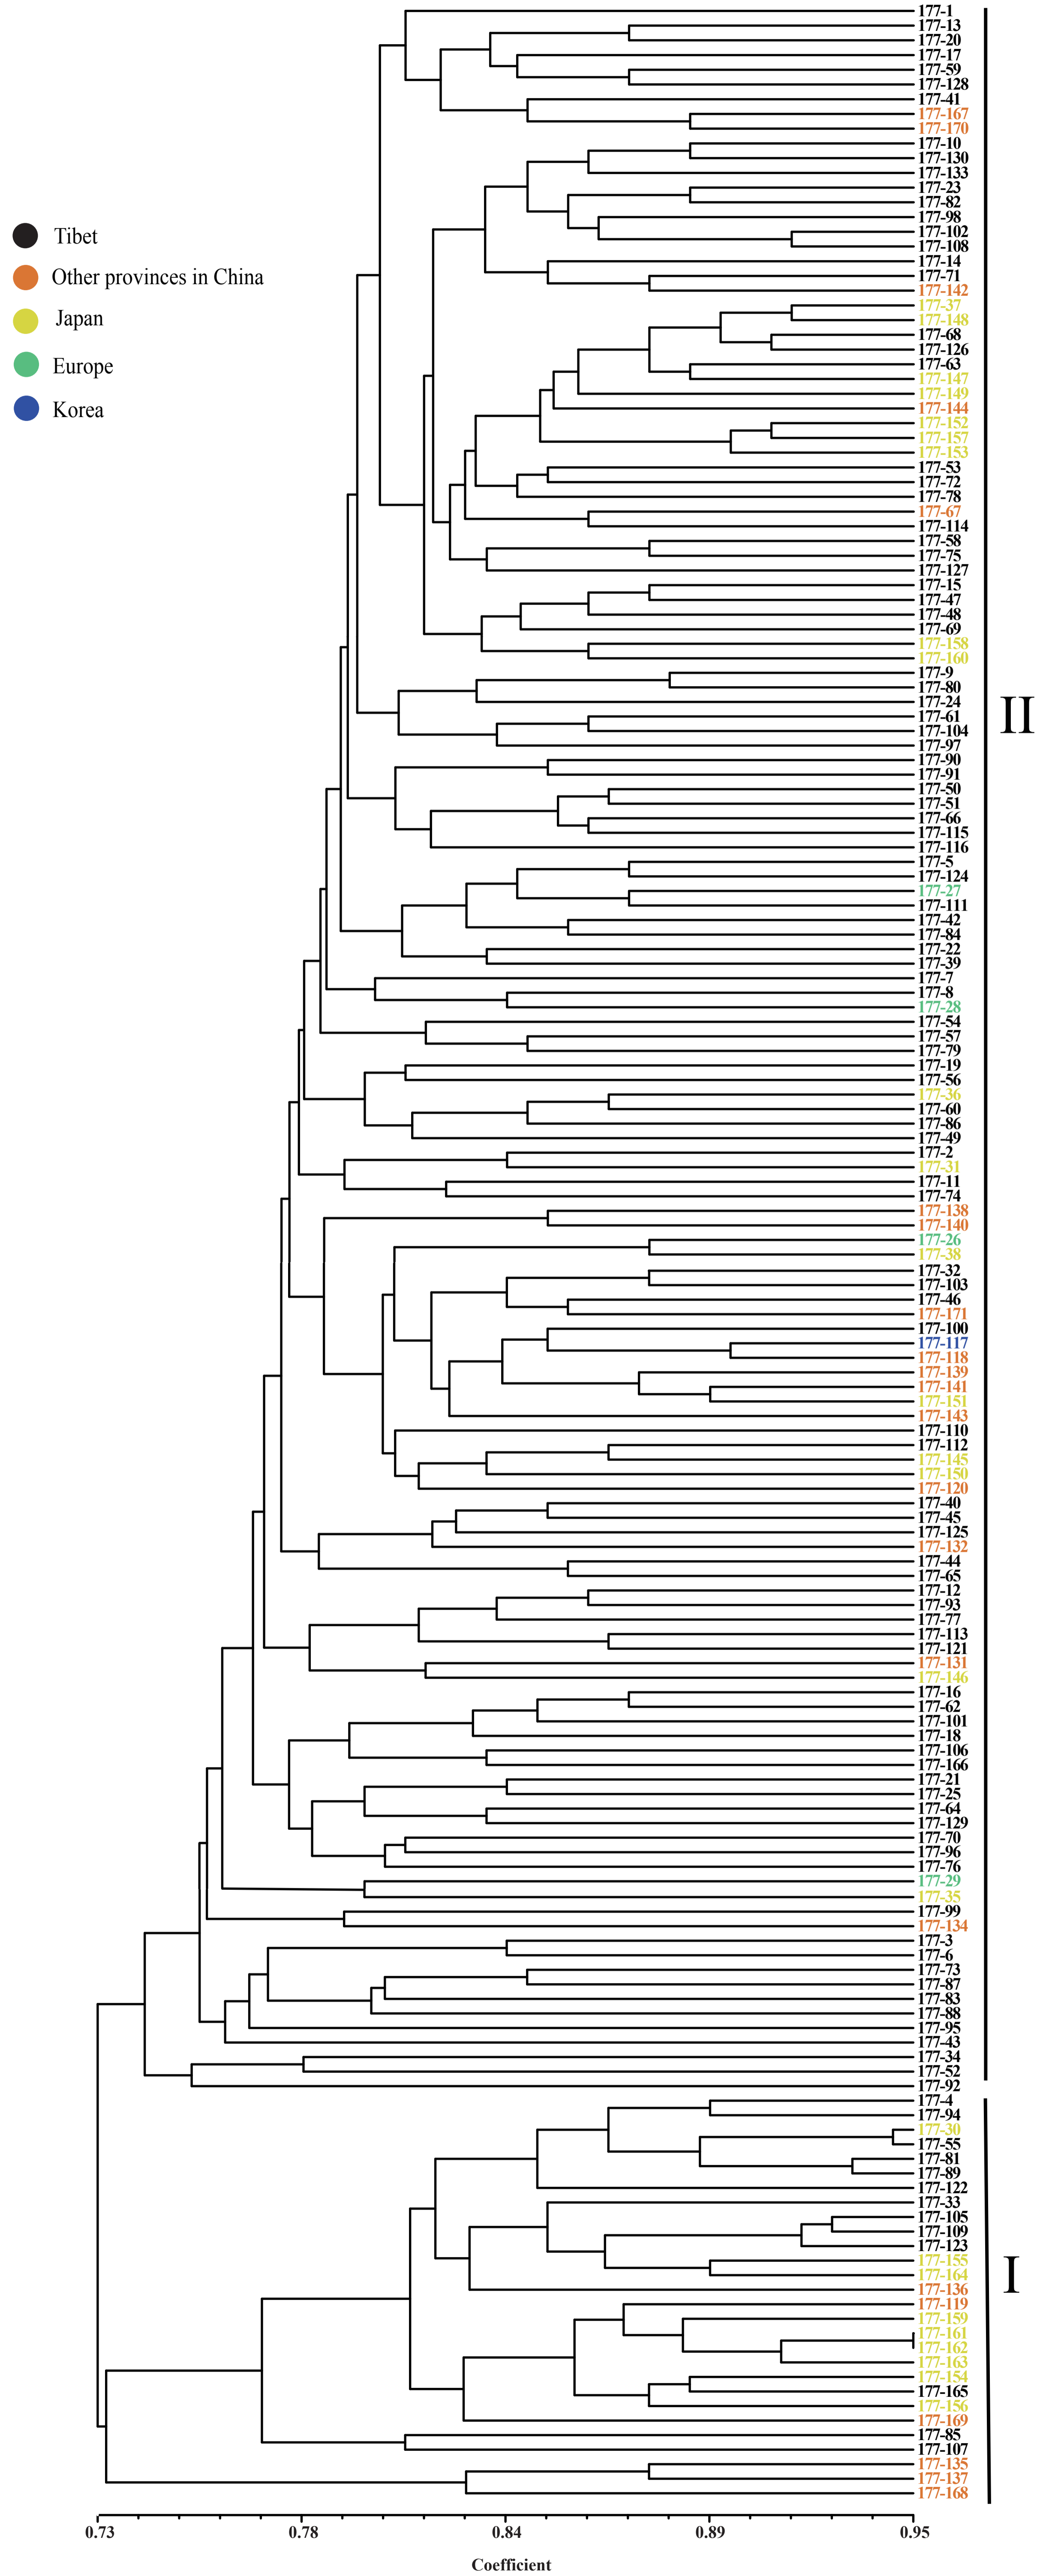

Supplement: s1 [file s1 › Figure S4.pdf]
