# Supplementary material for: Genetic Diversity and Primary Core Collection Construction of Turnip (Brassica rapa L. ssp. rapifera Matzg) Landraces in Tibet Revealed via Morphological and SSR Markers
Source: MDPI journal article supplement (doi:10.3390/agronomy11101901), 2021-09-22

**Figure S5.** Dendrogram by cluster analysis of 118 turnip landraces collected from Tibet based on SSR markers.I = group 1; II = group 2.Cophenetic correlation values between the original matrices and the cophenetic matrices given by the UPGMA clustering process showed r=0.68,t=13.57,p=1.00

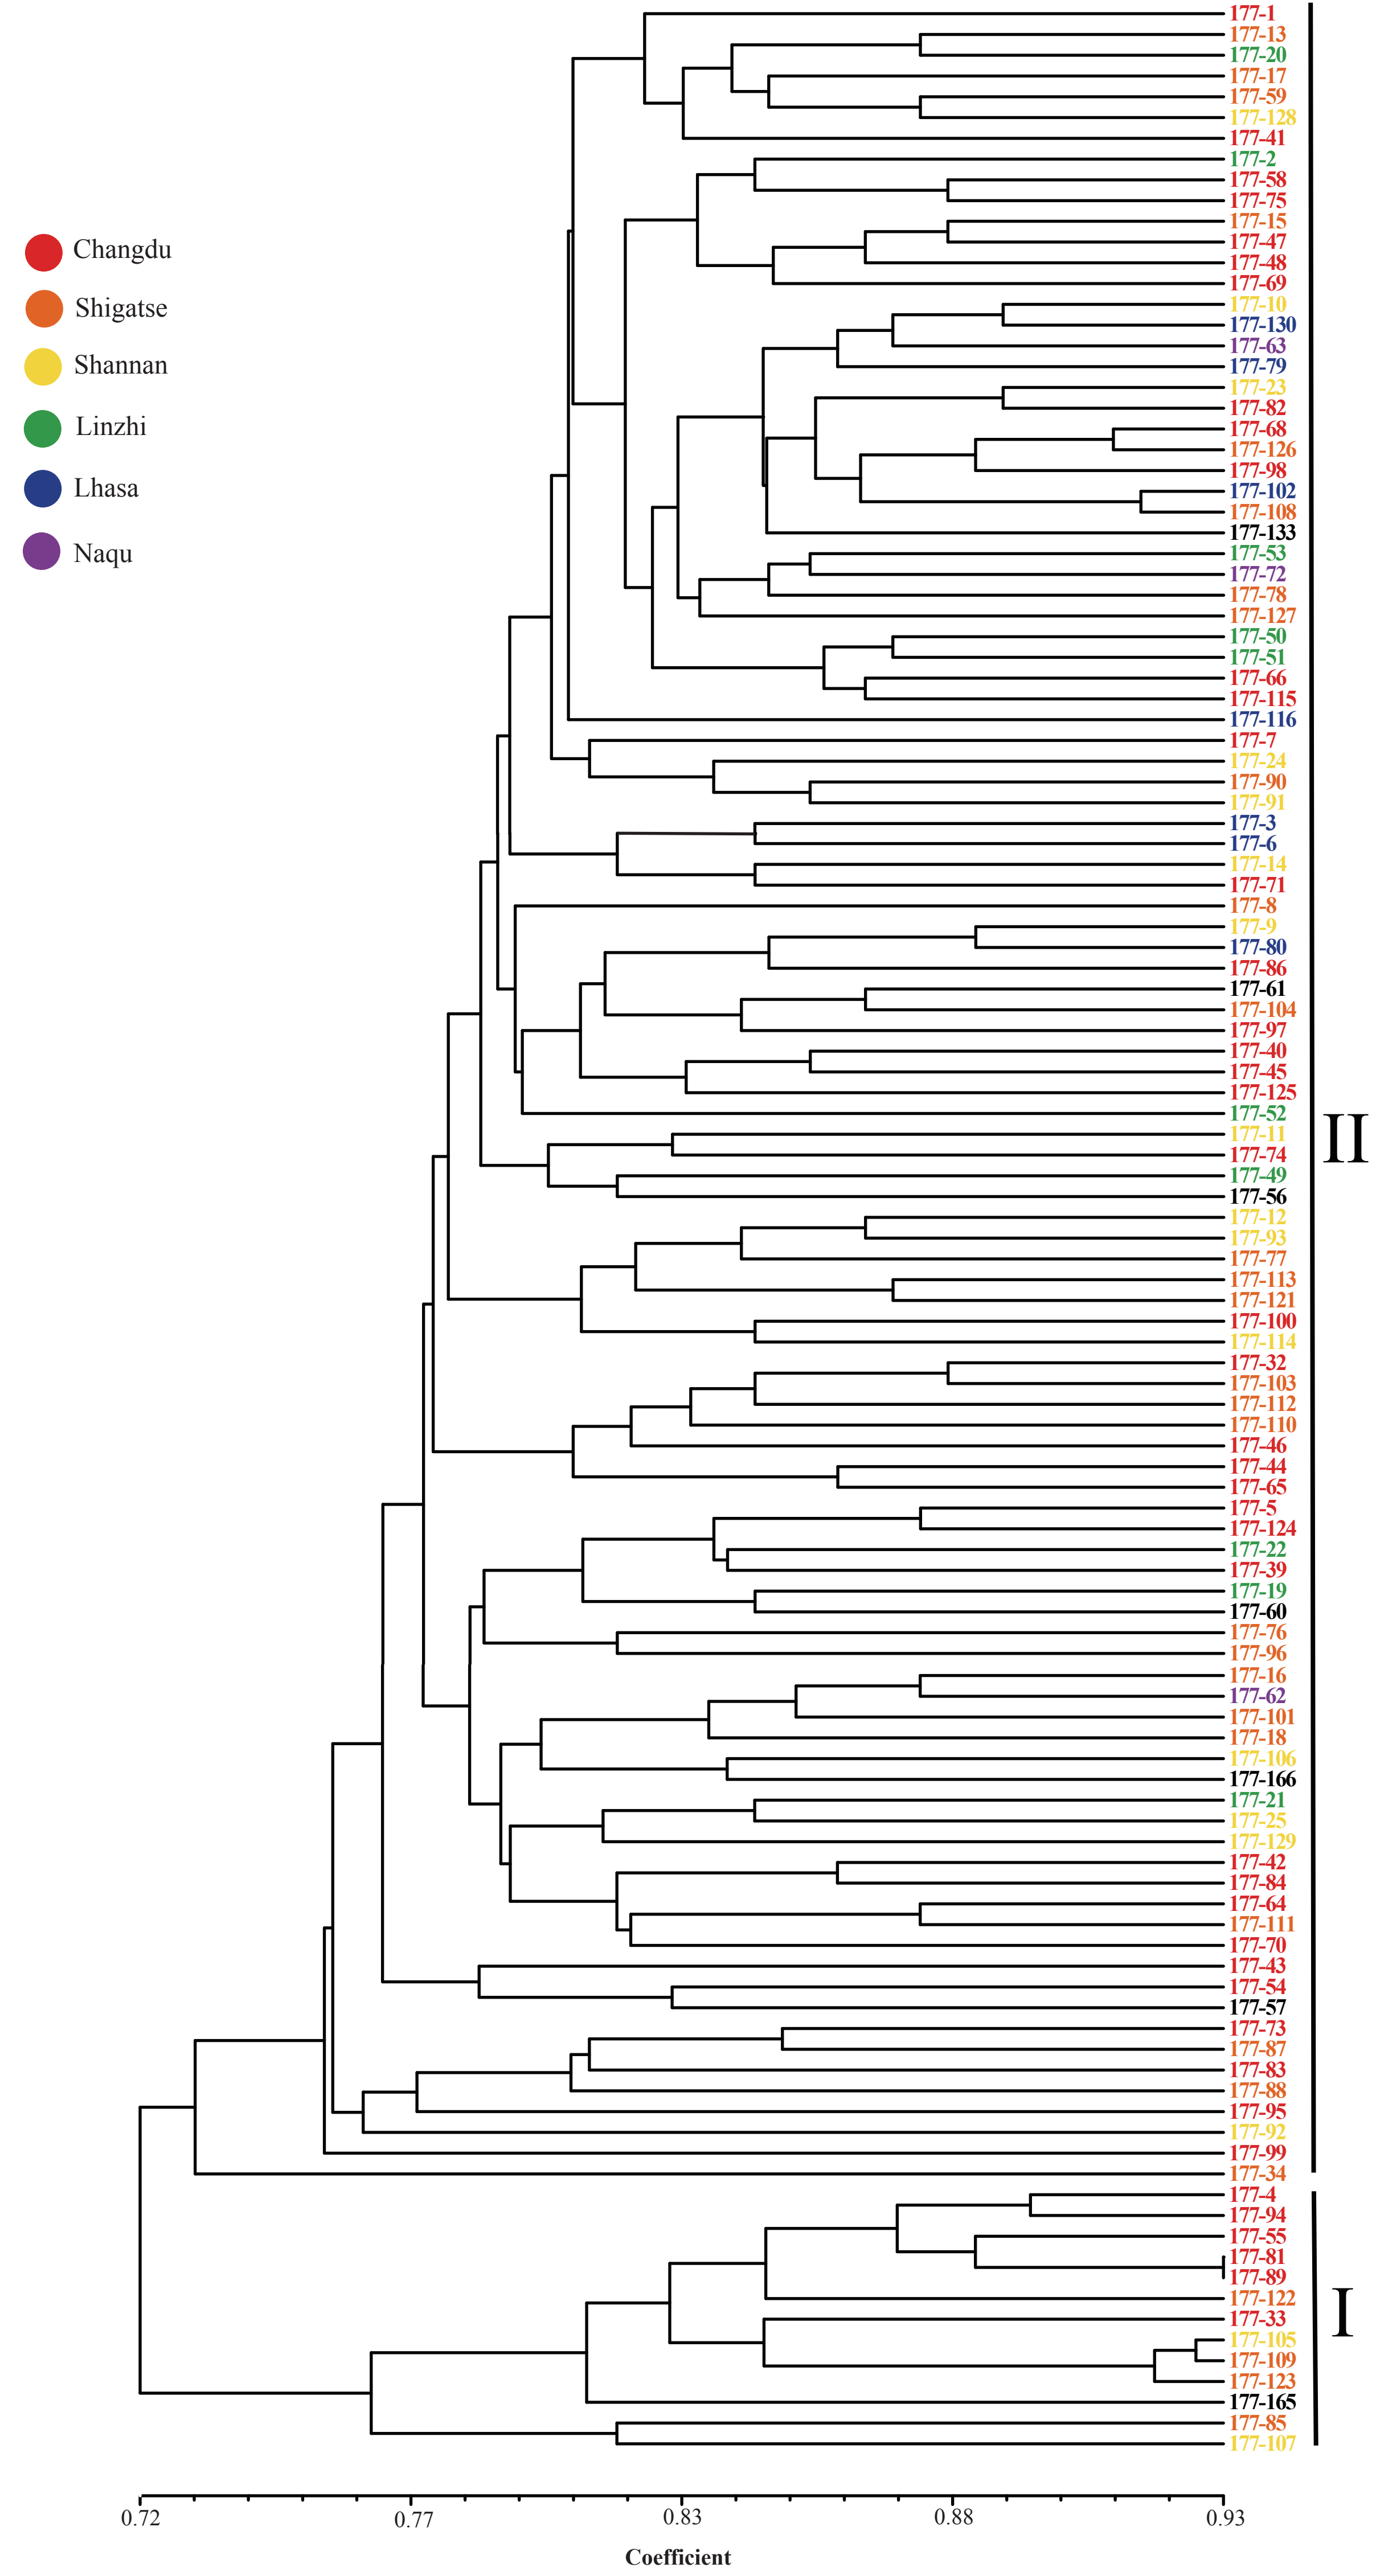

Supplement: s1 [file s1 › Figure S5.pdf]
