# Supplementary material for: Genetic Diversity and Primary Core Collection Construction of Turnip (Brassica rapa L. ssp. rapifera Matzg) Landraces in Tibet Revealed via Morphological and SSR Markers
Source: MDPI journal article supplement (doi:10.3390/agronomy11101901), 2021-09-22
Supplement: s1 [file s1 › Figure S7.pdf]

**Figure S7.** Comparison of genetic similarity coefficient matrix between morphological traits and SSR markers in turnip varieties by mantel test. Correlation test results showed  $r=-0.04$ ,  $t=-1.26$ ,  $p=0.10$ .

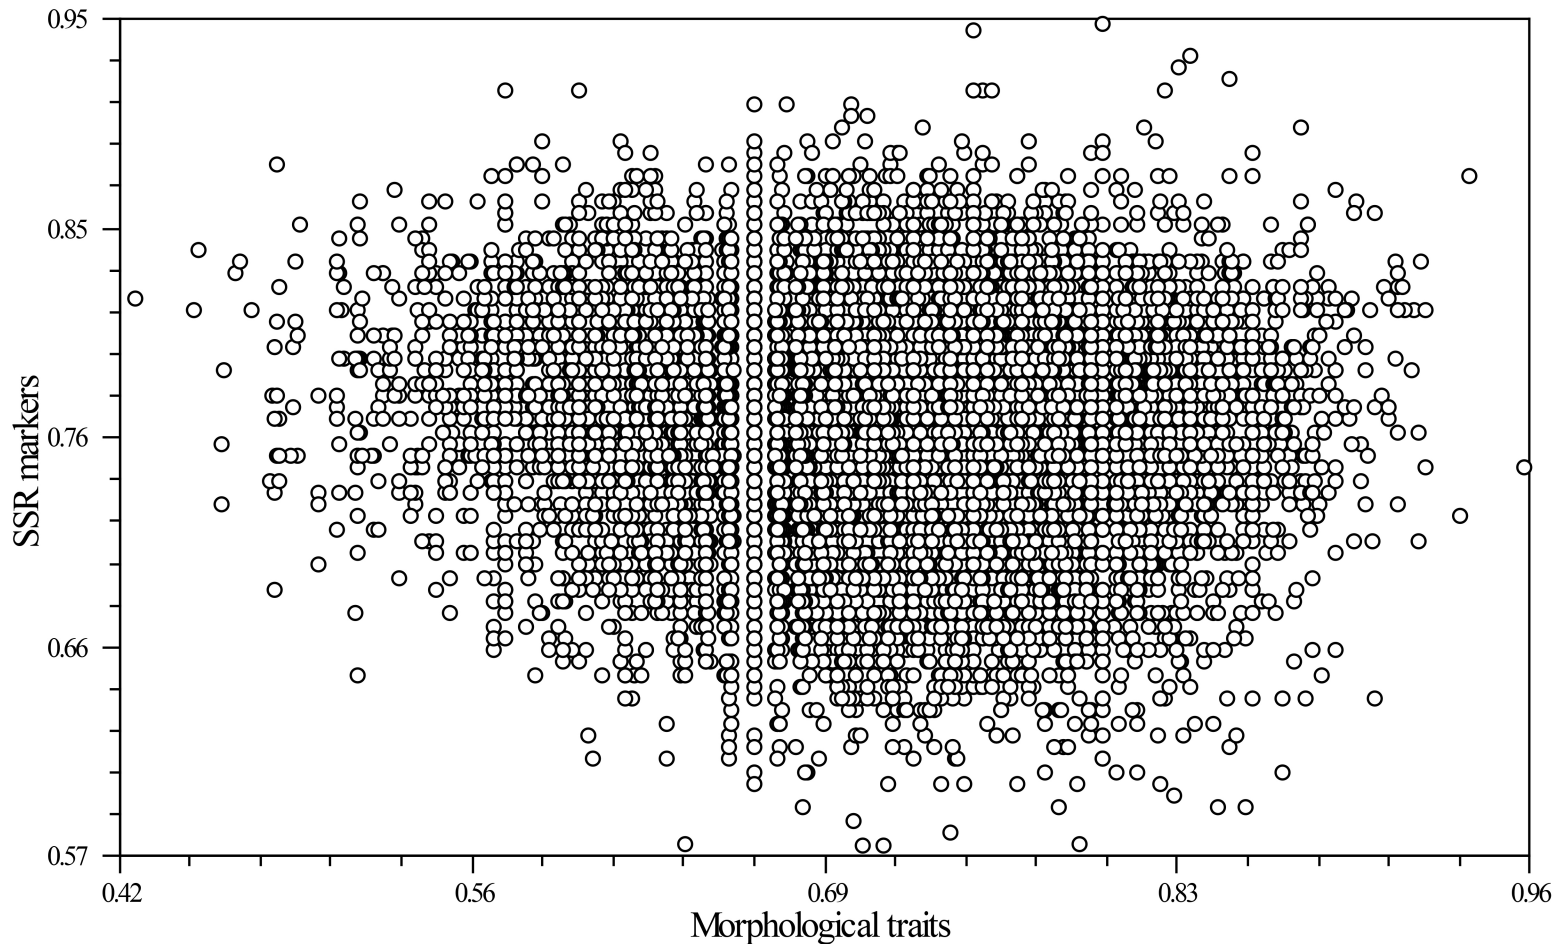

\*Permutations were set to their default values in NTSYS 2.10 e.
