# Supplementary material for: Genetic Diversity and Primary Core Collection Construction of Turnip (Brassica rapa L. ssp. rapifera Matzg) Landraces in Tibet Revealed via Morphological and SSR Markers
Source: MDPI journal article supplement (doi:10.3390/agronomy11101901), 2021-09-22

**Figure S8.** UPGMA dendrogram by cluster analysis of 171 turnip varieties using combined morphological traits and SSR markers. I = group 1; II = group 2. Cophenetic correlation values between the original matrices and the cophenetic matrices given by the UPGMA clustering process showed  $r=0.82$ ,  $t=13.8763$ ,  $p=1.00$

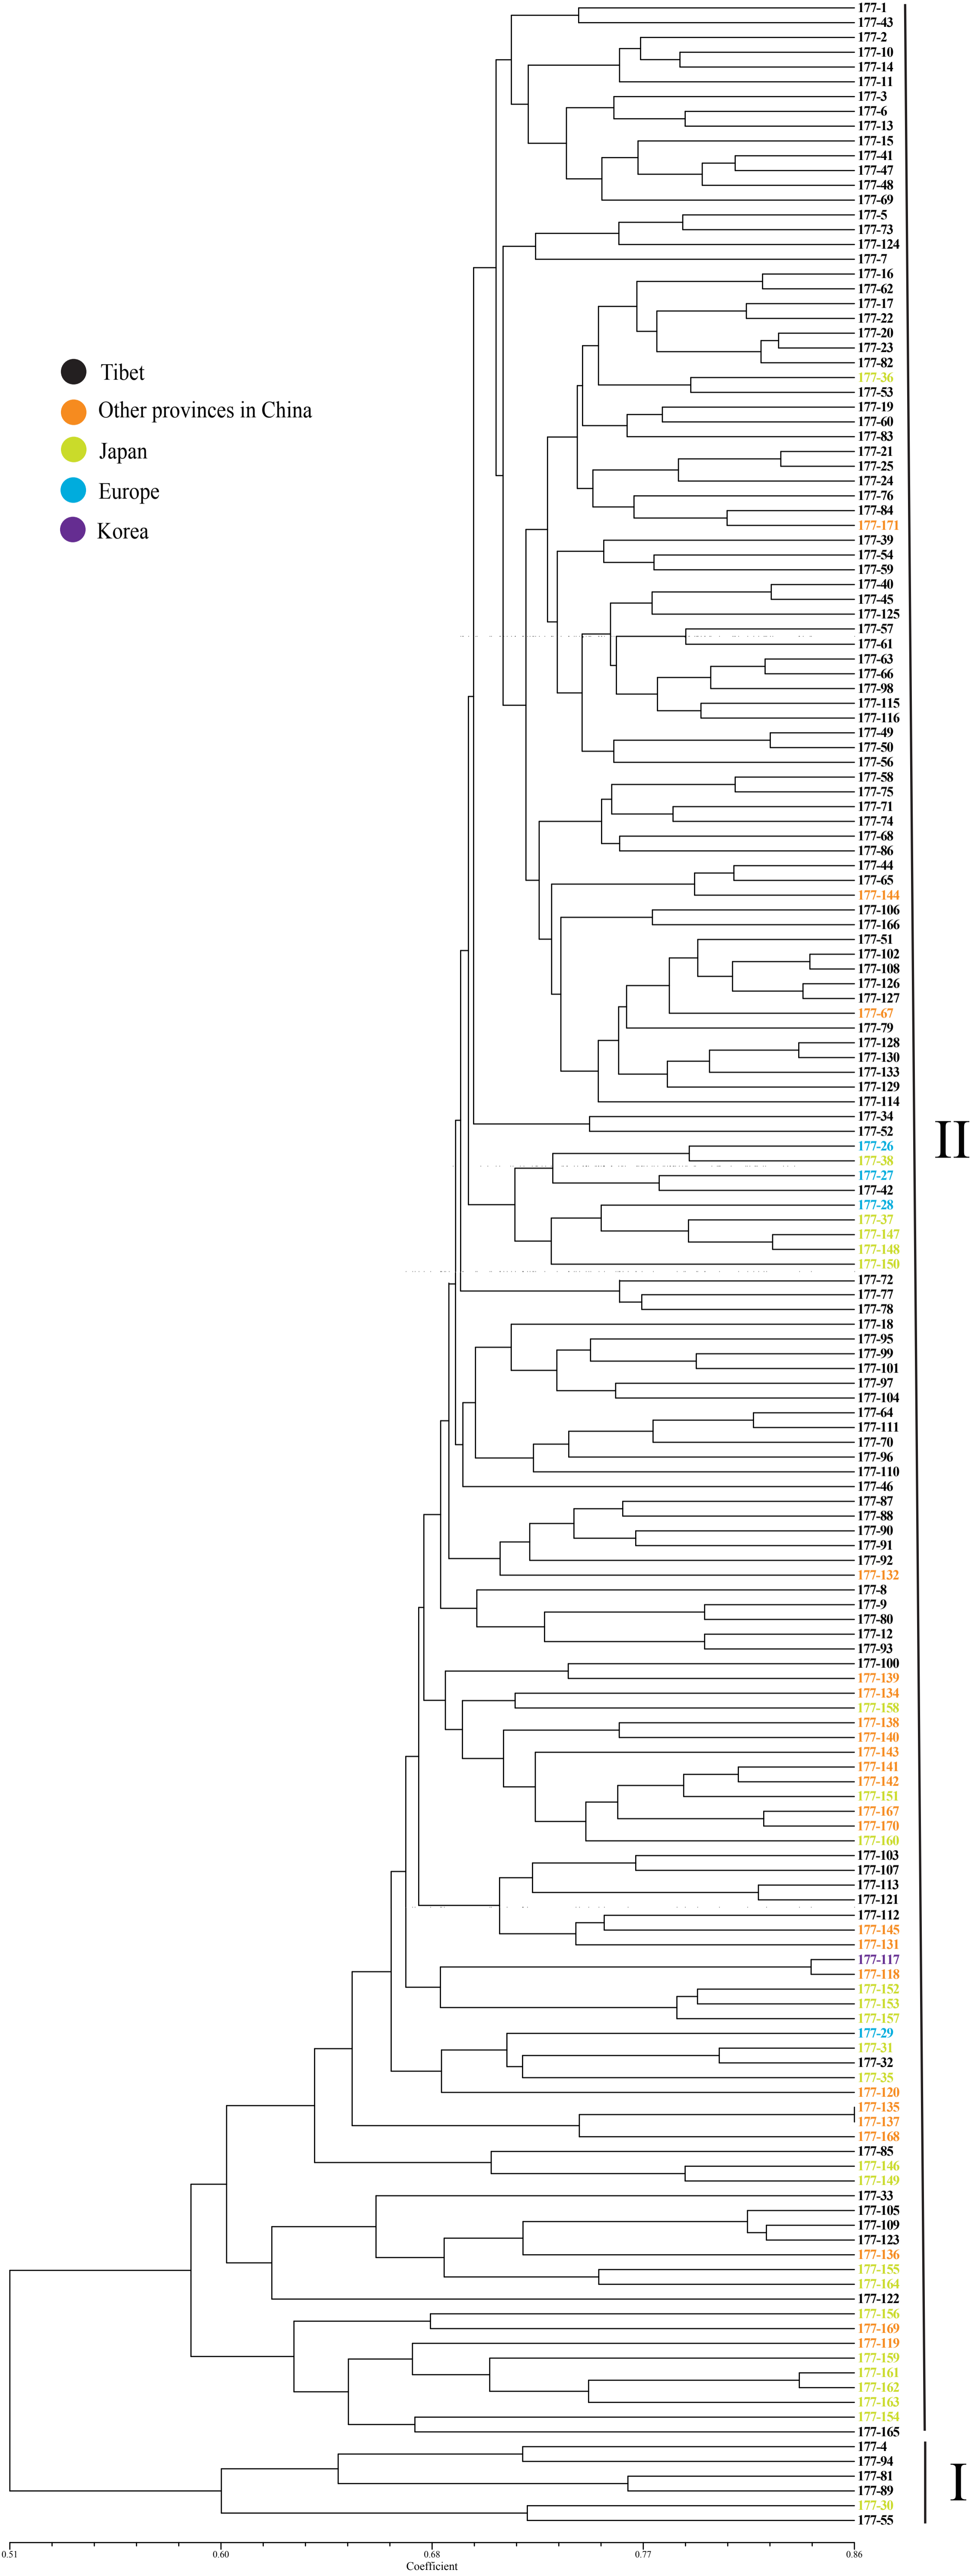

Supplement: s1 [file s1 › Figure S8.pdf]
