# Supplementary material for: Genetic Diversity and Primary Core Collection Construction of Turnip (Brassica rapa L. ssp. rapifera Matzg) Landraces in Tibet Revealed via Morphological and SSR Markers
Source: MDPI journal article supplement (doi:10.3390/agronomy11101901), 2021-09-22

**Figure S10.**Principal component analysis of 118 turnip landraces collected from Tibet.All varieties were aggregated into two groups, k\_1 and k\_2, matched to population structure. PCA 1 and PCA 2 explained 9.1% and 3.6% of the molecular variations, respectively.

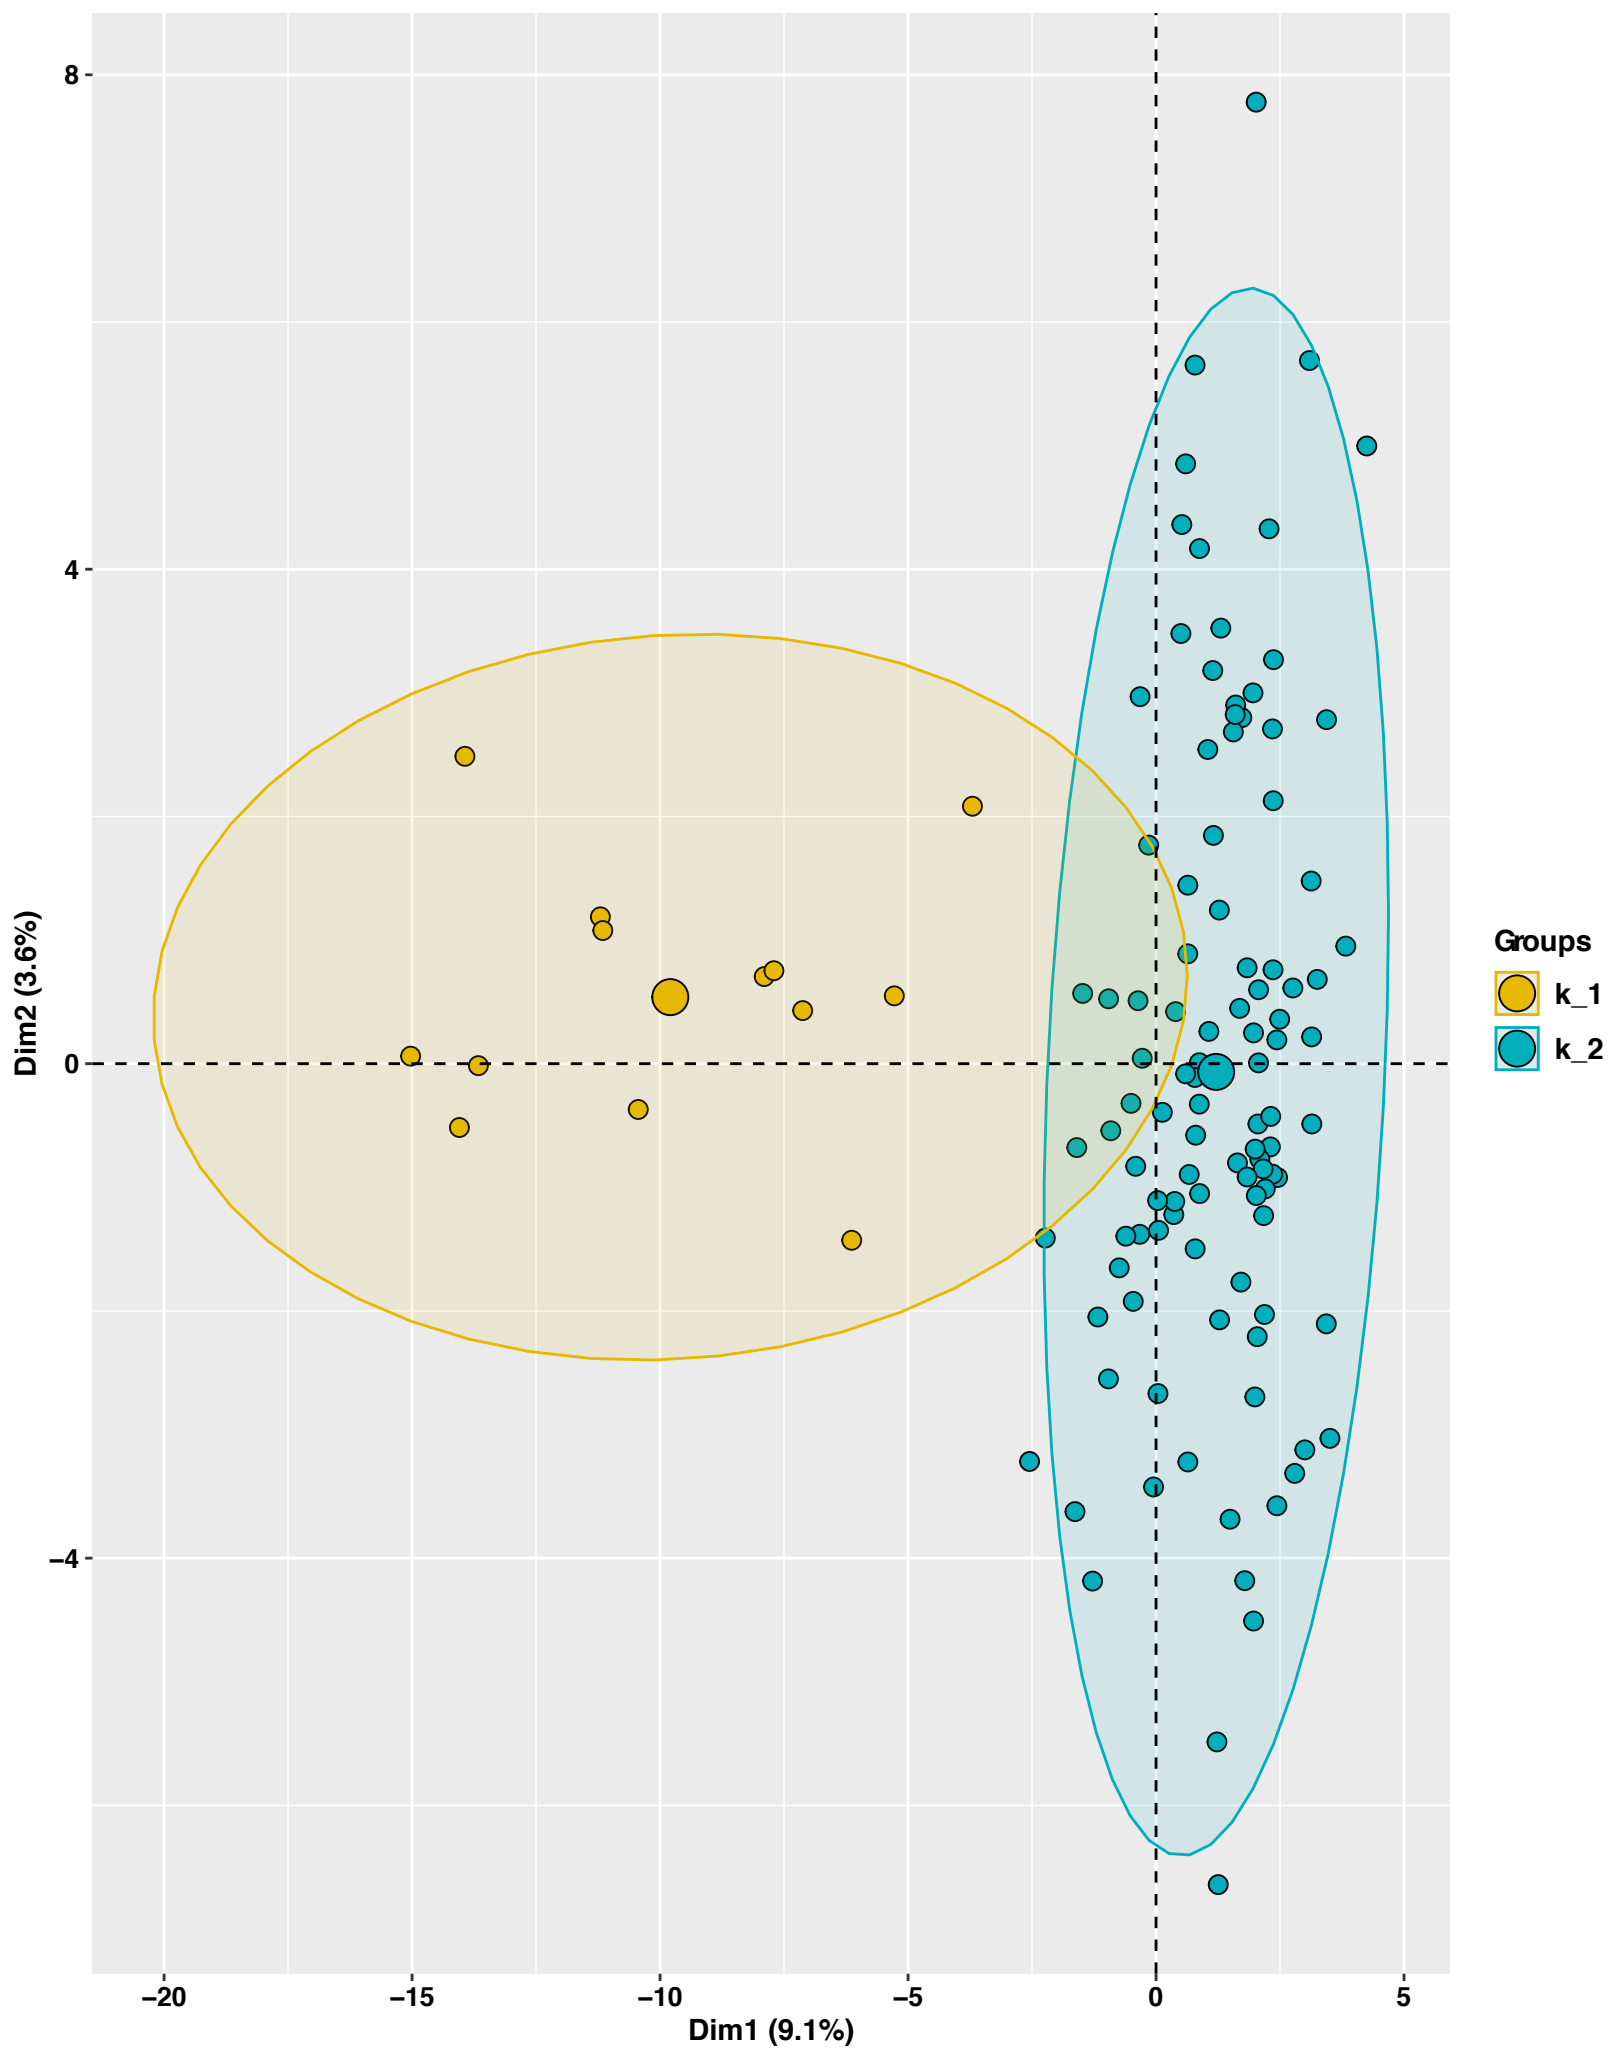

Supplement: s1 [file s1 › Figure S10.pdf]
