# Supplementary material for: Genetic Diversity and Primary Core Collection Construction of Turnip (Brassica rapa L. ssp. rapifera Matzg) Landraces in Tibet Revealed via Morphological and SSR Markers
Source: MDPI journal article supplement (doi:10.3390/agronomy11101901), 2021-09-22
Supplement: s1 [file s1 › Table S1.xlsx]

## Sheet: Sheet1
Table S1 Turnip varieties and landraces used in this study, and their geographical origin
Number code	Type	Group	Geographical origin location
177-01	Landrace	Turnip (B. rapa L. ssp. rapifera Matzg)	Laran village, Jida Town, Basu country,Changdu city,Tibet
177-02	Landrace	Turnip (B. rapa L. ssp. rapifera Matzg)	Gu village, Galang Tow, Bomi country,Nyingchi city,Tibet
177-03	Landrace	Turnip (B. rapa L. ssp. rapifera Matzg)	Qushui County, Lhasa City,Tibet
177-04	Landrace	Turnip (B. rapa L. ssp. rapifera Matzg)	Mao Ni village, Hao DaTown, Mengkang County,Changdu city,Tibet
177-05	Landrace	Turnip (B. rapa L. ssp. rapifera Matzg)	Wusa village,Zayu town , Zuogong country,Changdu city,Tibet
177-06	Landrace	Turnip (B. rapa L. ssp. rapifera Matzg)	Farm seed of Nimu County,Lhasa city,Tibet
177-07	Landrace	Turnip (B. rapa L. ssp. rapifera Matzg)	Soduoxi town, Mangkang County, Changdu city,Tibet
177-08	Landrace	Turnip (B. rapa L. ssp. rapifera Matzg)	Padang village, Renbu country,Shigatse city,Tibet
177-09	Landrace	Turnip (B. rapa L. ssp. rapifera Matzg)	Farm seed of Longzi County-1,Shannan city,Tibet
177-10	Landrace	Turnip (B. rapa L. ssp. rapifera Matzg)	Farm seed of Longzi County-2,Shannan city,Tibet
177-11	Landrace	Turnip (B. rapa L. ssp. rapifera Matzg)	Farm seed of Lankazi County-2,Shannan city,Tibet
177-12	Landrace	Turnip (B. rapa L. ssp. rapifera Matzg)	Farm seed of Lankazi County-1,Shannan city,Tibet
177-13	Landrace	Turnip (B. rapa L. ssp. rapifera Matzg)	Farm seed of Jiangzi County，Shigatse city,Tibet
177-14	Landrace	Turnip (B. rapa L. ssp. rapifera Matzg)	Farm seed of Naidong County,Shannan city,Tibet
177-15	Landrace	Turnip (B. rapa L. ssp. rapifera Matzg)	Chia Village, Chia Town, Renbu County-1，Shigatse city,Tibet
177-16	Landrace	Turnip (B. rapa L. ssp. rapifera Matzg)	Chia Village, Chia Town, Renbu County-2，Shigatse city,Tibet
177-17	Landrace	Turnip (B. rapa L. ssp. rapifera Matzg)	Bai Jia Village, Cha er Town, Nanmu Lin County-1，Shigatse city,Tibet
177-18	Landrace	Turnip (B. rapa L. ssp. rapifera Matzg)	Bai Jia Village, Cha er Town, Nanmu Lin County-2，Shigatse city,Tibet
177-19	Landrace	Turnip (B. rapa L. ssp. rapifera Matzg)	Mini village, Qiangna Town, Milin country-1,Nyingchi city,Tibet
177-20	Landrace	Turnip (B. rapa L. ssp. rapifera Matzg)	Nianglong village, Qiangna Town, Milin country-1,Nyingchi city,Tibet
177-21	Landrace	Turnip (B. rapa L. ssp. rapifera Matzg)	Nianglong village, Qiangna Town, Milin country-2,Nyingchi city,Tibet
177-22	Landrace	Turnip (B. rapa L. ssp. rapifera Matzg)	Mini village, Qiangna Town, Milin country-2,Nyingchi city,Tibet
177-23	Landrace	Turnip (B. rapa L. ssp. rapifera Matzg)	Dongla village, Gongga country,Shannan city,Tibet
177-24	Landrace	Turnip (B. rapa L. ssp. rapifera Matzg)	Dui village, Qusong County,Shannan city,Tibet
177-25	Landrace	Turnip (B. rapa L. ssp. rapifera Matzg)	Niangsuo village, Jiangtang town, Gongga country,Shannan city,Tibet
177-26	Variety	Turnip (B. rapa L. ssp. rapifera Matzg)	Europe (ECD01)
177-27	Variety	Turnip (B. rapa L. ssp. rapifera Matzg)	Europe (ECD02)
177-28	Variety	Turnip (B. rapa L. ssp. rapifera Matzg)	Europe (ECD03)
177-29	Variety	Turnip (B. rapa L. ssp. rapifera Matzg)	Europe (ECD04)
177-30	Variety	Turnip (B. rapa L. ssp. rapifera Matzg)	Japan
177-31	Variety	Turnip (B. rapa L. ssp. rapifera Matzg)	Japan
177-32	Landrace	Turnip (B. rapa L. ssp. rapifera Matzg)	Basu County,Changdu city,Tibet (Red-skin turnip)
177-33	Landrace	Turnip (B. rapa L. ssp. rapifera Matzg)	Kangsha village, Luolong country, Changdu city,Tibet
177-34	Landrace	Turnip (B. rapa L. ssp. rapifera Matzg)	Reza village, Razi country, Shigatse city,Tibet
177-35	Variety	Turnip (B. rapa L. ssp. rapifera Matzg)	Japan
177-36	Variety	Turnip (B. rapa L. ssp. rapifera Matzg)	Japan
177-37	Variety	Turnip (B. rapa L. ssp. rapifera Matzg)	Japan (Snow damaru kabu 077 / 03）
177-38	Variety	Turnip (B. rapa L. ssp. rapifera Matzg)	Japan (1108-03 self-selfing)
177-39	Landrace	Turnip (B. rapa L. ssp. rapifera Matzg)	Hua Qian village, Xiexiong Town, Dingqing County, Changdu city,Tibet
177-40	Landrace	Turnip (B. rapa L. ssp. rapifera Matzg)	Chi du Town, Dingqing County, Changdu city,Tibet
177-41	Landrace	Turnip (B. rapa L. ssp. rapifera Matzg)	Zhongsha village, Xiexiong town, Dingqing country, Changdu city,Tibet
177-42	Landrace	Turnip (B. rapa L. ssp. rapifera Matzg)	Zaxi village, Sangduo town, Wuqi country, Changdu city,Tibet
177-43	Landrace	Turnip (B. rapa L. ssp. rapifera Matzg)	Dodu Village, Binda Town, Wumqi County, Changdu city,Tibet
177-44	Landrace	Turnip (B. rapa L. ssp. rapifera Matzg)	Mengda Village, Wuqi Town, Wuqi County, Changdu city,Tibet
177-45	Landrace	Turnip (B. rapa L. ssp. rapifera Matzg)	Girando village, Jido town, Wuqi country, Changdu city,Tibet
177-46	Landrace	Turnip (B. rapa L. ssp. rapifera Matzg)	Qi Ritong Village, Sangduo Town, similar Wuqi County, Changdu city,Tibet
177-47	Landrace	Turnip (B. rapa L. ssp. rapifera Matzg)	Sanda village, Sangduo town, Wuqi country, Changdu city,Tibet
177-48	Landrace	Turnip (B. rapa L. ssp. rapifera Matzg)	Rurado village, Jido town, Wuqi country, Changdu city,Tibet
177-49	Landrace	Turnip (B. rapa L. ssp. rapifera Matzg)	Songzong village, Bomi country,Nyingchi city,Tibet
177-50	Landrace	Turnip (B. rapa L. ssp. rapifera Matzg)	Kaida Village, Boomi County,Nyingchi city,Tibet
177-51	Landrace	Turnip (B. rapa L. ssp. rapifera Matzg)	Sotong village, Bomi country,Nyingchi city,Tibet
177-52	Landrace	Turnip (B. rapa L. ssp. rapifera Matzg)	Qingduo village, Bomi country,Nyingchi city,Tibet
177-53	Landrace	Turnip (B. rapa L. ssp. rapifera Matzg)	Gu village, Bomi County,Nyingchi city,Tibet
177-54	Landrace	Turnip (B. rapa L. ssp. rapifera Matzg)	Badong Village, Badu County, Changdu city,Tibet
177-55	Landrace	Turnip (B. rapa L. ssp. rapifera Matzg)	Baxoi County, Changdu city,Tibet
177-56	Landrace	Turnip (B. rapa L. ssp. rapifera Matzg)	Tibet
177-57	Landrace	Turnip (B. rapa L. ssp. rapifera Matzg)	NWQ DG,Tibet
177-58	Landrace	Turnip (B. rapa L. ssp. rapifera Matzg)	Yifa village, Nimu town, Bianba country, Changdu city,Tibet
177-59	Landrace	Turnip (B. rapa L. ssp. rapifera Matzg)	JZSW，Shigatse city,Tibet
177-60	Landrace	Turnip (B. rapa L. ssp. rapifera Matzg)	NWQ BB,Tibet
177-61	Landrace	Turnip (B. rapa L. ssp. rapifera Matzg)	LLML BX,Tibet
177-62	Landrace	Turnip (B. rapa L. ssp. rapifera Matzg)	Seven Village, Rongbu Town, Suo County,Naqu city,Tibet
177-63	Landrace	Turnip (B. rapa L. ssp. rapifera Matzg)	Anoda village, Rongbu town, Soxian country,Naqu city,Tibet
177-64	Landrace	Turnip (B. rapa L. ssp. rapifera Matzg)	Deng Xiu village, Chaya County, Changdu city,Tibet
177-65	Landrace	Turnip (B. rapa L. ssp. rapifera Matzg)	Da Lang village, Yinduo town, Chaya County, Changdu city,Tibet
177-66	Landrace	Turnip (B. rapa L. ssp. rapifera Matzg)	Ba Xin village,Yanduo town , Chaya country, Changdu city,Tibet
177-67	Landrace	Turnip (B. rapa L. ssp. rapifera Matzg)	Baqian County, Yushu City, Qinghai Province
177-68	Landrace	Turnip (B. rapa L. ssp. rapifera Matzg)	Gaiba village, Tongpu town, Jiangda country, Changdu city,Tibet
177-69	Landrace	Turnip (B. rapa L. ssp. rapifera Matzg)	Team 1, Polo Town, Jiangda County, Changdu city
177-70	Landrace	Turnip (B. rapa L. ssp. rapifera Matzg)	Xiangpi Village, Xiangpi Town, Gongye County, Changdu city,Tibet
177-71	Landrace	Turnip (B. rapa L. ssp. rapifera Matzg)	Mauni Village, Gangda Town, Mankang County, Changdu city,Tibet
177-72	Landrace	Turnip (B. rapa L. ssp. rapifera Matzg)	Ru village,Baiga town, Bilu country,Naqu city,Tibet
177-73	Landrace	Turnip (B. rapa L. ssp. rapifera Matzg)	Qu se village, Raduo Town, Changdu County,Tibet
177-74	Landrace	Turnip (B. rapa L. ssp. rapifera Matzg)	Zuo Ba village, Changdu Town, Changdu County,Tibet
177-75	Landrace	Turnip (B. rapa L. ssp. rapifera Matzg)	Guqu Village, Zizizang Town, Lulong County, Changdu city,Tibet
177-76	Landrace	Turnip (B. rapa L. ssp. rapifera Matzg)	Reza village, Lazi country, Shigatse city,Tibet
177-77	Landrace	Turnip (B. rapa L. ssp. rapifera Matzg)	Yadong County (flat circle)，Shigatse city,Tibet
177-78	Landrace	Turnip (B. rapa L. ssp. rapifera Matzg)	Yadong County (radish shape)，Shigatse city,Tibet
177-79	Landrace	Turnip (B. rapa L. ssp. rapifera Matzg)	Qüxü County (Langjie), Lhasa City,Tibet
177-80	Landrace	Turnip (B. rapa L. ssp. rapifera Matzg)	Qüxü County, Lhasa City,Tibet
177-81	Landrace	Turnip (B. rapa L. ssp. rapifera Matzg)	Kangsha village, Luolong country, Changdu city,Tibet
177-82	Landrace	Turnip (B. rapa L. ssp. rapifera Matzg)	Meiyu Town, Zuogong County, Changdu city,Tibet
177-83	Landrace	Turnip (B. rapa L. ssp. rapifera Matzg)	Zogang County, Changdu city,Tibet
177-84	Landrace	Turnip (B. rapa L. ssp. rapifera Matzg)	Gang Da town, Changdu City,Tibet
177-85	Landrace	Turnip (B. rapa L. ssp. rapifera Matzg)	Xia Yadong Asan village, Yadong County，Shigatse city,Tibet
177-86	Landrace	Turnip (B. rapa L. ssp. rapifera Matzg)	Tianqiao Town, Zugongxian County, Changdu city,Tibet
177-87	Landrace	Turnip (B. rapa L. ssp. rapifera Matzg)	Jiangga town, Dingjie country, Shigatse city,Tibet
177-88	Landrace	Turnip (B. rapa L. ssp. rapifera Matzg)	Ma Xiang Tu Gu village, Bailang County, Shigatse city,Tibet
177-89	Landrace	Turnip (B. rapa L. ssp. rapifera Matzg)	Niangxi village, Jiangda country, Changdu city,Tibet
177-90	Landrace	Turnip (B. rapa L. ssp. rapifera Matzg)	Dong Jia village, Sangzhuzi District, Shigatse city,Tibet
177-91	Landrace	Turnip (B. rapa L. ssp. rapifera Matzg)	La Sui village, Jiacha County, Shannan City,Tibet
177-92	Landrace	Turnip (B. rapa L. ssp. rapifera Matzg)	La Sui village, Jiacha County, Shannan City,Tibet
177-93	Landrace	Turnip (B. rapa L. ssp. rapifera Matzg)	La Sui village, Jiacha County, Shannan City,Tibet
177-94	Landrace	Turnip (B. rapa L. ssp. rapifera Matzg)	Wuya village,wuya town,Zuogong County, Changdu City,Tibet
177-95	Landrace	Turnip (B. rapa L. ssp. rapifera Matzg)	Xiaochang du village, Quzi Ka town, Mengkang County, Changdu City,Tibet
177-96	Landrace	Turnip (B. rapa L. ssp. rapifera Matzg)	Gapu village, Bailang country, Shigatse city,Tibet
177-97	Landrace	Turnip (B. rapa L. ssp. rapifera Matzg)	Deng Village, Xinrong Township, Leng County, Changdu City,Tibet
177-98	Landrace	Turnip (B. rapa L. ssp. rapifera Matzg)	Da Xi village,Yulong town , Jiangda County, Changdu City,Tibet
177-99	Landrace	Turnip (B. rapa L. ssp. rapifera Matzg)	Wuya village,wuya town,Zuogong County, Changdu City,Tibet
177-100	Landrace	Turnip (B. rapa L. ssp. rapifera Matzg)	Chi du town, Dingqing County, Changdu City,Tibet
177-101	Landrace	Turnip (B. rapa L. ssp. rapifera Matzg)	Kang Xiong village, Renbu County, Shigatse city,Tibet
177-102	Landrace	Turnip (B. rapa L. ssp. rapifera Matzg)	Niewood Town, Nimu County, Lhasa City,Tibet
177-103	Landrace	Turnip (B. rapa L. ssp. rapifera Matzg)	Saga town, Saga country, Shigatse city,Tibet
177-104	Landrace	Turnip (B. rapa L. ssp. rapifera Matzg)	Nanmu Lin town, Nanmu Lin County, Shigatse city,Tibet
177-105	Landrace	Turnip (B. rapa L. ssp. rapifera Matzg)	Jiangmen Village, Longjie, Gongga County, Shannan city,Tibet
177-106	Landrace	Turnip (B. rapa L. ssp. rapifera Matzg)	Xiga Xue village, Zagu County, Shannan city,Tibet
177-107	Landrace	Turnip (B. rapa L. ssp. rapifera Matzg)	3 Village, Kahu town, Langcazi County, Shannan city,Tibet
177-108	Landrace	Turnip (B. rapa L. ssp. rapifera Matzg)	Chugu village, Jiangzi country，Shigatse city,Tibet
177-109	Landrace	Turnip (B. rapa L. ssp. rapifera Matzg)	Rinbung County，Shigatse city,Tibet
177-110	Landrace	Turnip (B. rapa L. ssp. rapifera Matzg)	Shek Village, Sakya County，Shigatse city,Tibet
177-111	Landrace	Turnip (B. rapa L. ssp. rapifera Matzg)	Ma Pu village, Saad County，Shigatse city,Tibet
177-112	Landrace	Turnip (B. rapa L. ssp. rapifera Matzg)	Qu Chong village, Lian town, Xigaze City，Shigatse city,Tibet
177-113	Landrace	Turnip (B. rapa L. ssp. rapifera Matzg)	Kanong town, Renbu County,Shannan city，Shigatse city,Tibet
177-114	Landrace	Turnip (B. rapa L. ssp. rapifera Matzg)	Nagarzê County，Shannan city,Tibet
177-115	Landrace	Turnip (B. rapa L. ssp. rapifera Matzg)	Kesai village, Bangda town, Changdu city,Tibet
177-116	Landrace	Turnip (B. rapa L. ssp. rapifera Matzg)	Qu Yuan (Longjie II), Lhasa City,Tibet
177-117	Variety	Chinese cabbage (B. campestris L. ssp. pekinensis)	Korea
177-118	Variety	Chinese cabbage (B. campestris L. ssp. pekinensis)	China
177-119	Variety	Turnip (B. rapa L. ssp. rapifera Matzg)	Wenzhou city, Zhejiang Province
177-120	Variety	Turnip (B. rapa L. ssp. rapifera Matzg)	Wenzhou city, Zhejiang province
177-121	Landrace	Turnip (B. rapa L. ssp. rapifera Matzg)	Chugu village, Jiangzi country，Shigatse city,Tibet
177-122	Landrace	Turnip (B. rapa L. ssp. rapifera Matzg)	Zijin village, Jiangzi country，Shigatse city,Tibet
177-123	Landrace	Turnip (B. rapa L. ssp. rapifera Matzg)	Pu village, Saga County，Shigatse city,Tibet
177-124	Landrace	Turnip (B. rapa L. ssp. rapifera Matzg)	Geru Village, Chaya County,Changdu city,Tibet
177-125	Landrace	Turnip (B. rapa L. ssp. rapifera Matzg)	Bangda town, Changdu country,Changdu city,Tibet
177-126	Landrace	Turnip (B. rapa L. ssp. rapifera Matzg)	Kang Xiong village, Renbu County, Shigatse city,Tibet
177-127	Landrace	Turnip (B. rapa L. ssp. rapifera Matzg)	Zhichong village, Shigatse city,Tibet
177-128	Landrace	Turnip (B. rapa L. ssp. rapifera Matzg)	Jina 4 Village, Gongga County,Shannan city,Tibet
177-129	Landrace	Turnip (B. rapa L. ssp. rapifera Matzg)	Xuegang Village 1, Gongga County,Shannan city,Tibet
177-130	Landrace	Turnip (B. rapa L. ssp. rapifera Matzg)	Qushui, Lhasa City,Tibet
177-131	Variety	Turnip (B. rapa L. ssp. rapifera Matzg)	Beijing (Dongsheng, small turnip )
177-132	Variety	Turnip (B. rapa L. ssp. rapifera Matzg)	Wenzhou city, Zhejiang Province
177-133	Landrace	Turnip (B. rapa L. ssp. rapifera Matzg)	Tibet
177-134	Variety	Turnip (B. rapa L. ssp. rapifera Matzg)	Huaiyuan County, Bengbu City, Anhui Province
177-135	Variety	Turnip (B. rapa L. ssp. rapifera Matzg)	Huaiyuan County, Bengbu City, Anhui Province
177-136	Variety	Turnip (B. rapa L. ssp. rapifera Matzg)	Pingshan County, Shijiazhuang City, Hebei Province
177-137	Variety	Turnip (B. rapa L. ssp. rapifera Matzg)	Pingshan County, Shijiazhuang City, Hebei Province
177-138	Variety	Turnip (B. rapa L. ssp. rapifera Matzg)	Baotou City, Inner Mongolia Autonomous Region
177-139	Variety	Turnip (B. rapa L. ssp. rapifera Matzg)	China (V01C0011)
177-140	Variety	Turnip (B. rapa L. ssp. rapifera Matzg)	China (V01C0013)
177-141	Variety	Turnip (B. rapa L. ssp. rapifera Matzg)	China (V01C0012)
177-142	Variety	Turnip (B. rapa L. ssp. rapifera Matzg)	China (V01C0015)
177-143	Variety	Turnip (B. rapa L. ssp. rapifera Matzg)	China (V01C0017)
177-144	Variety	Turnip (B. rapa L. ssp. rapifera Matzg)	Qinghai
177-145	Variety	Turnip (B. rapa L. ssp. rapifera Matzg)	Beijing (Dongsheng, small turnip )
177-146	Variety	Turnip (B. rapa L. ssp. rapifera Matzg)	Japan
177-147	Variety	Turnip (B. rapa L. ssp. rapifera Matzg)	Japan
177-148	Variety	Turnip (B. rapa L. ssp. rapifera Matzg)	Japan
177-149	Variety	Turnip (B. rapa L. ssp. rapifera Matzg)	Japan
177-150	Variety	Turnip (B. rapa L. ssp. rapifera Matzg)	Japan
177-151	Variety	Turnip (B. rapa L. ssp. rapifera Matzg)	Japan
177-152	Variety	Turnip (B. rapa L. ssp. rapifera Matzg)	Japan
177-153	Variety	Turnip (B. rapa L. ssp. rapifera Matzg)	Japan
177-154	Variety	Turnip (B. rapa L. ssp. rapifera Matzg)	Japan
177-155	Variety	Turnip (B. rapa L. ssp. rapifera Matzg)	Japan
177-156	Variety	Turnip (B. rapa L. ssp. rapifera Matzg)	Japan
177-157	Variety	Turnip (B. rapa L. ssp. rapifera Matzg)	Japan
177-158	Variety	Turnip (B. rapa L. ssp. rapifera Matzg)	Japan
177-159	Variety	Turnip (B. rapa L. ssp. rapifera Matzg)	Japan
177-160	Variety	Turnip (B. rapa L. ssp. rapifera Matzg)	Japan
177-161	Variety	Turnip (B. rapa L. ssp. rapifera Matzg)	Japan
177-162	Variety	Turnip (B. rapa L. ssp. rapifera Matzg)	Japan
177-163	Variety	Turnip (B. rapa L. ssp. rapifera Matzg)	Japan
177-164	Variety	Turnip (B. rapa L. ssp. rapifera Matzg)	Japan
177-165	Landrace	Turnip (B. rapa L. ssp. rapifera Matzg)	Tibet
177-166	Landrace	Turnip (B. rapa L. ssp. rapifera Matzg)	Tibet
177-167	Variety	Turnip (B. rapa L. ssp. rapifera Matzg)	China (V01C0003)
177-168	Variety	Turnip (B. rapa L. ssp. rapifera Matzg)	China (V01C0005)
177-169	Variety	Turnip (B. rapa L. ssp. rapifera Matzg)	China (V01C0007)
177-170	Variety	Turnip (B. rapa L. ssp. rapifera Matzg)	China (V01C0008)
177-171	Variety	Turnip (B. rapa L. ssp. rapifera Matzg)	China (V01C0009)
