# Supplementary material for: Genetic Diversity and Primary Core Collection Construction of Turnip (Brassica rapa L. ssp. rapifera Matzg) Landraces in Tibet Revealed via Morphological and SSR Markers
Source: MDPI journal article supplement (doi:10.3390/agronomy11101901), 2021-09-22
Supplement: s1 [file s1 › Table S2.xlsx]

## Sheet: Sheet1
Table S2 All morphological traits measured in this study
Qualatative traits (25)	Recording criteria of qualitative traits			Quatitative traits (33)	Units
Cotyledon color	Yellow green = 1, light green = 2, green = 3, dark green = 4, purple = 5			Cotyledon length	cm
Hypocotyl color	White = 1, green = 2, yellow green = 3, light green = 4, green = 5, dark green = 6, purple white = 7, purple green = 8			Cotyledon width	cm
Plant type	upright = 1, semi-upright = 2, unfold = 3, semi-collapse = 4, collapse = 5			Cotyledon groove deepth	cm
Leaf type	Mosaic = 1, platy leaf = 2			Plant height	cm
Leaf shape	Near-round = 1, ovoid = 2, oblong = 3, obovate = 4, long obovate = 5, oval = 6, oblong = 7, lanceolate = 8			Plant length (Plant breadth)	cm
Leaf surface	Smooth = 1, microwrinkle = 2, wrinkle = 3, much wrinkle = 4			Plant width	cm
Leaf wax powder	None = 0, little = 1, medium = 2, much = 3			Numbers of leaves	number
Leaf color	Yellow green = 1, light green = 2, green = 3, dark green = 4, ink green = 5, purple green = 6, purple = 7			Lamina length	cm
Fleshy tuber position	All = 1, 50% = 2, 25% = 3, very few = 4			Lamina width	cm
Fleshy tuber shape	Long cone = 1, short cone = 2, long cylinder = 3, short cylinder = 4, near sphere = 5			Petiole length	cm
Shape of tuber shoulder	Depression = 1, flat = 2, protruding = 3			Petiole width	cm
Scar on tuber shoulder	None = 0, small = 1, medium = 2, large = 3			Petiole thickness	cm
Tuber shoot skin color	Yellow and white = 1, yellow and green = 2, light green = 3, green = 4, dark green = 5, red and white = 6, red = 7, green = 8.			Plant weight	g
Exterior color of above-ground tuber	White = 1, yellow and white = 2, gray = 3, light green = 4, red and white = 5, red = 6			Tuber weight	g
Lateral Tuber distribution	None = 0, little = 1, medium = 2, much = 3			Fleshy tuber width	cm
Leaf vein freshness	Not obvious = 0, obvious = 1			Fleshy tuber length	cm
Leaf vein gloss	None = 0, Weak = 1, Medium = 2, Strong = 3			Length of the above-ground tuber	cm
Leaf fissure	No-fissure=0, auricular fissure=1, shallow fissure=2, deep fissure=3, featherical total fissure=4, fragmentation=5.			Flower length	mm
Petiole color	White = 1, green and white = 2, light green = 3, green = 4, dark green = 5, dark green = 6, purple green = 7, purple = 8			Flower width	mm
Cross section shape of petiole	Circle = 1, semicircular = 2, flat circle = 3			Sepal length	mm
Leaf tip shape	Sharp tip = 1, blunt tip = 2, circle = 3, wide circle = 4.			Sepal width	mm
Leaf margin undulate	None = 0, small = 1, medium = 2, large = 3.			Petal length	mm
Lateral bud germination ability (Tillering)	None = 0, weak = 1, strong = 2			Petal width	mm
Bolting time	early = 1, medium = 2, late = 3			Filament length	mm
Product maturity	Very early = 1, early = 2, medium = 3, late = 4, very late = 5			Filament width	mm
				Short filament length	mm
				Short filament width	mm
				Anther length	mm
				Anther width	mm
				Pistil length	mm
				Pistil width	mm
				Style length	mm
				Style width	mm
