# Supplementary material for: Genetic Diversity and Primary Core Collection Construction of Turnip (Brassica rapa L. ssp. rapifera Matzg) Landraces in Tibet Revealed via Morphological and SSR Markers
Source: MDPI journal article supplement (doi:10.3390/agronomy11101901), 2021-09-22
Supplement: s1 [file s1 › Table S3.xlsx]

## Sheet: Sheet1
	Table S3. 31 pairs of SSR primers with polymorphism and their basic information
No.	Primer code	SSR	start	end	FORWARD PRIMER1 (5'-3')	Tm(℃)	REVERSE PRIMER1 (5'-3')	Tm(℃)	Marker source
1	BrSSR00001	(TAA)5	5178	5192	GGGTTGACAAGTGATGCAAA	59.547	ATCCTCATGGTCCCTTGCTA	59.508	Wang et al.(2012）
2	BrSSR00005	(AT)10	20344	20363	GAAAAGCAGCACAACAACGA	60.035	GAGGATAGTAGGCACGCCAG	59.859	Wang et al.(2012）
3	BrSSR00033	(AT)6	82317	82328	TCCAGTGATGCTGGTGAATC	59.637	GGTTCTCGTGAGACTGAGGC	59.993	Wang et al.(2012）
4	BrSSR00074	(GA)6	184635	184646	TTTACGCAAAAGCTTGGAAGA	60.007	CACTCACATGAATGGATTGGA	59.358	Wang et al.(2012）
5	BrSSR00089	(TGGCTA)5	267706	267735	GAAGTCAAAATCTGGACGCA	58.85	GCCACTCCACTCTCGAAATC	59.81	Wang et al.(2012）
6	BrSSR00106	(GCG)5	324890	324904	TATCGAACTCGTCGCAAGTG	60.011	GCTTCATCCCCTTCTCACAA	60.195	Wang et al.(2012）
7	BrSSR00122	(TGA)7	362408	362428	TCGTACCGAAAACATACGCA	60.133	CAAACAGCTTTGCCACTTCA	60.027	Wang et al.(2012）
8	BrSSR00152	(AG)6	471666	471677	GAGGCCACAATGCTCTCTTC	59.957	TCATGGGGGAGTTACCATGT	60.05	Wang et al.(2012）
9	BrSSR00160	(TTG)8	513487	513510	GGCGATTATACGCTCAGCTC	59.973	TGCTCTCCCACTTTCCAGAT	59.803	Wang et al.(2012）
10	BrSSR00201	(T)18	722019	722036	TCGCCTAGGTCTTCCACTCT	59.04	TGACGACCTTAACCACGTCTC	60.164	Wang et al.(2012）
11	BrSSR00207	(TTC)6	758442	758459	TGATGAAGCCATGAAAATGC	59.628	GGATCAACGAGGACAGAGGA	60.199	Wang et al.(2012）
12	BrSSR00208	(CT)6	758545	758556	CTTTGTTCTGGGCTCCTCTG	59.982	CAAGAGGTGAGAGTTGGGGA	60.229	Wang et al.(2012）
13	BrSSR00278	(AC)15	1017145	1017174	AGCAACGTGGACTCCTTTGT	59.769	ACAGAAGCATAAGGCGAGGA	59.978	Wang et al.(2012）
14	BrSSR06409	(TC)7	2417291	2417304	GTCGTGTTCGGAGATTGAAA	58.697	CGACTGTGAAGCCAAACAAA	59.881	Wang et al.(2012）
15	BrSSR06840	(TTCTTG)3	4258974	4258991	ATCCTCATCATCGTGGCTTC	60.042	CAGTTTCGATCCGGAGAAAG	59.807	Wang et al.(2012）
16	BrSSR16626	(ATT)6	20481621	20481638	GTTCAATCGGTCAGAGCACC	60.667	GGAAGATGATGGGGAAAACA	59.727	Wang et al.(2012）
17	BrSSR16982	(TATTT)4	22015107	22015126	TTGTTAAATGTGCGACAGCC	59.735	CATCTCATTTAGTCAACACAACCA	59.064	Wang et al.(2012）
18	BrSSR19222	(ATG)9	827813	827839	TCATCACCGCTTCTTCAGTG	59.984	CCCATAGTCCCATTGTCTCAA	59.799	Wang et al.(2012）
19	BrSSR19752	(AACCC)4	3544094	3544113	GTTTGGTCGAAACAGTTGGG	60.388	ATGTCTGGTTTAAGGCCACG	59.993	Wang et al.(2012）
20	BrSSR23195	(TC)6	251547	251558	GGTAAGGCCCACATTAGCAA	59.96	GAAAGCTTGAGGGAAGCAGA	59.694	Wang et al.(2012）
21	BrSSR24347	(TAA)5	5225518	5225532	AACGGTGCGTTTTAATGAGG	59.996	TGTAGTGCTCAAATGCCTCG	60.011	Wang et al.(2012）
22	BrSSR25246	(CAC)9	9894261	9894287	GTGAAGCTCGTCACCTCCTC	59.993	CTTCAAGCTCACGACAACCA	60.025	Wang et al.(2012）
23	BrSSR28237	(TCC)6	567990	568007	TCAATCACGTGCTCTCCAAC	59.837	GCAAAACACTCACCAGAGCA	60.032	Wang et al.(2012）
24	BrSSR29061	(AT)7	4286886	4286899	TAAGCCCATCTACCACCCAA	60.323	TGCATGGGTTCTTCTTTTCC	60.051	Wang et al.(2012）
25	BrSSR31687	(TTTAT)4	17739328	17739347	ATTTACCGATCGAAAGGGCT	59.93	GACATTGGAACGTGTGTTGC	60.016	Wang et al.(2012）
26	BrSSR36642	(AGAAAG)3	14257694	14257711	ATTTGTTTTTATGCACCGCC	59.838	CCTTGAGTGCTACTTTGGGAA	59.364	Wang et al.(2012）
27	BrSSR36802	(TTC)5	14864709	14864723	TCGTCGACTATGCCAATGAA	60.22	ACAGTGCGCAAAAGGAAAAT	59.752	Wang et al.(2012）
28	BrSSR37406	(CAACCG)3	17403043	17403060	ACCAGTCATAAGTCACCCGC	59.997	TCGCGACAACGTCTTAATTG	59.872	Wang et al.(2012）
29	BrSSR39105	(GATT)4	2229145	2229160	CCACAAGGAGTTAGGGCAAA	60.103	ATTTATTCGCACGCAAAAGC	60.233	Wang et al.(2012）
30	BrSSR39694	(AT)6	5577772	5577783	TCCAGAGGCTTTGCCATATC	60.177	AATAACATACGCGTGAGGGG	59.845	Wang et al.(2012）
31	BrSSR43814	(TC)6	3155193	3155204	AACAAAGCCAACAAACACCC	59.875	ACAGGTTTTACCAACGGCAC	59.898	Wang et al.(2012）
These markers were developed based on the whole genomic sequence of B. rapa (A01-A10，Accessions Codes: DDBJ/GenBank/EMBL_AENI00000000;AENI01000000)
