# Supplementary material for: Genetic Diversity and Primary Core Collection Construction of Turnip (Brassica rapa L. ssp. rapifera Matzg) Landraces in Tibet Revealed via Morphological and SSR Markers
Source: MDPI journal article supplement (doi:10.3390/agronomy11101901), 2021-09-22
Supplement: s1 [file s1 › Table S4.xlsx]

## Sheet: Sheet1
Table S4.Variation analysis of qualitative traits in turnip accessions
Qualitative Traits	The whole population													Collections from Tibet
	Distribution frequency of each grade (%)										Coefficient of variation（%)	H'		Distribution frequency of each grade (%)										Coefficient of variation（%)	H'
	0	1	2	3	4	5	6	7	8	9				0	1	2	3	4	5	6	7	8	9
Cotyledon color				99.4152	0.584795						2.5441	0.06					100							0	0
Hypocotyl color		12.8655	13.4503		42.1053	6.43275		17.5439	4.67836	2.92398	51.1831	1.63			16.9492	4.23729		52.5424	1.69492		17.7966	4.23729	2.54237	50.4228	1.39
Plant type		1.75439	70.7602	26.9006	0.584795						21.7414	0.72				69.4915	29.661	0.847458						20.9165	0.66
Leaf type			100								0	0				100								0	0
Leaf shape			8.77193	88.3041		2.92398					15.2417	0.43				5.9322	93.2203		0.847458					10.2668	0.28
Leaf surface		13.4503	86.5497								18.3433	0.39			11.0169	88.9831								16.6383	0.35
Leaf wax powder	100										0	0		100										0	0
Leaf color				94.152	4.67836	1.16959					9.72594	0.25					99.1525		0.847458					6.10269	0.06
Fleshy tuber position		2.92398	11.1111	32.1637	50.8772	2.33918					24.4915	1.13				5.9322	35.5932	57.6271	0.847458					17.6202	0.9
Fleshy tuber shape		0.584795	10.5263	8.18713	17.5439	60.2339					24.4806	1.11			0.847458	5.9322	5.9322	17.7966	68.6441					20.4033	1.04
Shape of tuber shoulder			97.076								0	0.03				99.1525								0	0.01
Scar on tuber shoulder	19.2982	49.1228	24.5614	4.09357							68.3122	1.14		24.5763	50.8475	21.1864	2.54237							74.1429	1.12
Tuber shoot skin color		30.9942	19.883	9.94152			5.26316	1.16959	29.8246		77.1993	1.47			31.3559	16.9492	9.32203			5.08475	0.847458	35.5932		74.5193	1.44
Exterior color of above-ground tuber		1.75439	78.3626			2.33918	14.6199				56.1712	0.63			1.69492	76.2712				21.1864				58.5242	0.61
Lateral Tuber distribution		41.5205	47.9532	7.60234							37.6534	0.92			44.0678	50.8475	4.23729							35.8666	0.83
Leaf vein freshness		100									0	0			100									0	0
Leaf vein gloss				100							0	0					100							0	0
Leaf fissure	2.33918		5.26316	11.6959	80.7018						21.1222	0.65		1.69492		0.847458	5.9322	91.5254						15.2678	0.37
Petiole color		0.584795	39.1813		59.0643			1.16959			33.0877	0.81				36.4407		63.5593						29.5499	0.65
Cross section shape of petiole		33.9181	52.6316	13.4503							36.7086	0.97			43.2203	52.5424	4.23729							35.4254	0.83
Leaf tip shape			69.0058	28.0702	2.92398						22.7934	0.72				75.4237	23.7288	0.847458						20.247	0.6
Leaf margin undulate	1.75439	91.2281	6.43275	0.584795							30.2383	0.38		1.69492	88.9831	8.47458	0.847458							33.1758	0.43
Lateral bud germination ability (Tillering)	98.8304		1.16959								0	0.06		98.3051		1.69492								0	0.1
Bolting time			0.584795	99.4152							2.55404	0.06				0.847458	99.1525							3.07727	0.06
Product maturity		7.01754	11.1111	19.2982	20.4678	42.1053					33.9254	1.43			1.69492	1.69492	17.7966	23.7288	55.0847					21.7957	1.14
Max	－	－	－	－	－	－	－	－	－	－	77.1993	1.63		－	－	－	－	－	－	－	－	－	－	74.5193	1.44
Min	－	－	－	－	－	－	－	－	－	－	0	0		－	－	－	－	－	－	－	－	－	－	0	0
Mean	－	－	－	－	－	－	－	－	－	－	23.5007	0.5996		－	－	－	－	－	－	－	－	－	－	21.7585	0.5148
