# Supplementary material for: Genetic Diversity and Primary Core Collection Construction of Turnip (Brassica rapa L. ssp. rapifera Matzg) Landraces in Tibet Revealed via Morphological and SSR Markers
Source: MDPI journal article supplement (doi:10.3390/agronomy11101901), 2021-09-22
Supplement: s1 [file s1 › Table S5.xlsx]

## Sheet: Sheet1
Table S5.Variation analysis of quantitative traits in turnip resources
Quantitative Trait	The whole population								Collections from Tibet
	Max	Min	Range	Mean	Standard deviation	Coefficient of variation（%)	H'		Max	Min	Range	Mean	Standard deviation	Coefficient of variation（%)	H'
Cotyledon length (cm)	1.8038	0.891	0.9128	1.34447	0.161316	11.9985	2.02		1.667	0.9964	0.6706	1.31462	0.143348	10.9041	2.03
Cotyledon width (cm)	2.4314	1.242	1.1894	1.80785	0.209094	11.5659	2.02		2.2614	1.3978	0.8636	1.78115	0.191823	10.7696	2.07
Cotyledon groove deepth (cm)	0.353	0.1202	0.2328	0.207723	0.0464065	22.3406	2.03		0.3288	0.1202	0.2086	0.195026	0.0394325	20.2191	2.04
Plant height (cm)	39.7667	7.33333	32.4333	21.4398	6.22456	29.0328	2.06		34.3333	7.33333	27	21.7065	6.14219	28.2966	2.11
Plant length (Plant breadth) (cm)	53	24.3333	28.6667	38.155	4.98179	13.0567	2.06		53	24.3333	28.6667	38.6031	5.20889	13.4934	2.06
Plant width(cm)	59.6667	29.9333	29.7333	44.1904	5.60679	12.6878	2.09		59.6667	29.9333	29.7333	44.4201	5.57723	12.5557	2.04
Numbers of leaves	50	8	42	13.0994	3.75258	28.647	1.7		50	8.66667	41.3333	13.178	4.06866	30.8747	1.58
Lamina length (cm)	41.8333	13.6	28.2333	25.0019	6.34841	25.3917	2.03		41.4333	13.6	27.8333	23.602	5.84097	24.7478	2.02
Lamina width (cm)	19.7667	7.7	12.0667	11.6983	2.0523	17.5436	2		19.7667	7.7	12.0667	11.5872	2.00163	17.2745	1.94
Petiole length (cm)	20.0667	1.5	18.5667	9.09485	3.20651	35.2563	1.58		20.0667	2.4	17.6667	9.56866	3.06771	32.06	1.85
Petiole width (cm)	2.06667	0.55	1.51667	1.12167	0.298625	26.6234	1.53		2.06667	0.55	1.51667	1.08025	0.286498	26.5214	1.69
Petiole thickness (cm)	1	0.3	0.7	0.503996	0.104406	20.7156	1.92		1	0.333333	0.666667	0.507345	0.10605	20.903	1.85
Plant weight (g)	1366.67	185	1181.67	577.714	193.354	33.4689	2.03		1048	185	863	573.383	172.76	30.1299	2.05
Tuber weight (g)	933.33	17	916.33	339.966	156.442	46.0169	2.08		746.667	25.33	721.337	376.867	135.251	35.8884	2.04
Fleshy tuber width (cm)	41	1.73	39.27	8.1963	3.45615	42.1672	1.63		12.16	1.73	10.43	8.58684	1.5855	18.4644	2.03
Fleshy tuber length (cm)	19.72	2.4	17.32	8.03196	2.67968	33.3628	2.01		15	4.08	10.92	8.00944	2.21529	27.6585	2.01
Length of the above-ground tuber (cm)	13.86	0	13.86	5.55525	2.09983	37.7989	2.02		10.3333	0	10.3333	5.85119	1.69142	28.9073	2.07
Flower length (mm)	20.735	8.20667	12.5283	12.7031	2.3384	18.4081	1.95		17.652	8.20667	9.44533	11.8004	1.51281	12.82	2.04
Flower width (mm)	16.348	6.77333	9.57467	10.558	1.83744	17.4034	1.98		15.108	6.77333	8.33467	9.8969	1.25401	12.6708	2.06
Sepal length (mm)	8.765	4.13333	4.63167	6.20465	0.724449	11.6759	2.05		8.06	4.13333	3.92667	6.04672	0.597856	9.88727	2.03
Sepal width (mm)	2.27	0.86	1.41	1.41028	0.269167	19.086	2.07		2.16	0.86	1.3	1.35162	0.237833	17.5961	2.05
Petal length (mm)	13.4	4.38667	9.01333	9.03066	1.68152	18.6201	2.08		11.4333	4.38667	7.04667	8.50952	1.46321	17.195	1.99
Petal width (mm)	9.012	3.21333	5.79867	4.99981	1.104	22.0808	1.93		7.504	3.21333	4.29067	4.64524	0.720723	15.5153	2.01
Filament length (mm)	8.88	3.808	5.072	6.19849	0.754709	12.1757	2		8.88	4.52667	4.35333	6.0888	0.674032	11.07	2.03
Filament width (mm)	1.082	0.493333	0.588667	0.674555	0.103021	15.2724	1.99		0.88	0.493333	0.386667	0.657989	0.0846785	12.8693	2.04
Short filament length (mm)	6.23333	2.228	4.00533	3.86231	0.689155	17.8431	2.08		5.50667	2.44667	3.06	3.74889	0.587866	15.6811	2.07
Short filament width (mm)	2.104	0.313333	1.79067	0.498325	0.144794	29.0562	1.55		0.706667	0.313333	0.393333	0.482463	0.0713904	14.7971	1.98
Anther length (mm)	2.87333	1.36	1.51333	2.10716	0.315095	14.9536	2.09		2.87333	1.36	1.51333	2.09614	0.307352	14.6628	2.08
Anther width (mm)	1.816	0.506667	1.30933	0.809425	0.159275	19.6775	1.89		1.17333	0.506667	0.666667	0.787322	0.134103	17.0328	1.98
Pistil length (mm)	10.7933	5.26667	5.52667	7.62453	1.0283	13.4867	2.05		10.2133	5.78667	4.42667	7.53902	0.963896	12.7854	2.02
Pistil width (mm)	1.35333	0.613333	0.74	0.930368	0.123834	13.3103	2.04		1.22667	0.613333	0.613333	0.908147	0.103588	11.4065	2.02
Style length (mm)	4.60667	1.68667	2.92	2.89058	0.586118	20.2768	2.08		4.19333	1.68667	2.50667	2.9135	0.565065	19.3947	2.07
Style width (mm)	0.964	0.333333	0.630667	0.538713	0.0980466	18.2001	1.93		0.826	0.333333	0.492667	0.51909	0.0774615	14.9225	2.01
Max	－	－	－	－	－	46.0169	2.09		－	－	－	－	－	35.8884	2.11
Min	－	－	－	－	－	11.5659	1.53		－	－	－	－	－	9.88727	1.58
Mean	－	－	－	－	－	22.097	1.95667		－	－	－	－	－	18.7871	1.99879
