# Supplementary material for: Genetic Diversity and Primary Core Collection Construction of Turnip (Brassica rapa L. ssp. rapifera Matzg) Landraces in Tibet Revealed via Morphological and SSR Markers
Source: MDPI journal article supplement (doi:10.3390/agronomy11101901), 2021-09-22
Supplement: s1 [file s1 › Table S6.xlsx]

## Sheet: Sheet1
Table 6 Traits with significant differences between groups based on morphology- tree
Traits (P<0.05)	Group
	I (145)	II (24)
Plant height	20.4±0.49 a	27.07±0.99 b
Plant length (Plant breadth)	37.19±0.37 a	43.87±0.78 b
Plant width	42.99±0.41 a	51.58±0.66 b
Lamina length	23.42±0.42 a	34.88±0.82 b
Lamina width	11.27±0.15 a	14.2±0.39 b
Petiole thickness	0.49±0.01 a	0.58±0.03 b
Different letters indicate significant differences (p < 0.05) between two groups by Wilcoxon rank sum test.
