# Supplementary material for: Genetic Diversity and Primary Core Collection Construction of Turnip (Brassica rapa L. ssp. rapifera Matzg) Landraces in Tibet Revealed via Morphological and SSR Markers
Source: MDPI journal article supplement (doi:10.3390/agronomy11101901), 2021-09-22
Supplement: s1 [file s1 › Table S7.xlsx]

## Sheet: Sheet1
Table S7 Traits with significant differences between groups based on dendrogram by SSR
Traits (P<0.05)	Group (whole population)			Traits (P<0.05)	Group (Tibet)
	I (28)	II (143)			I (13)	II (105)
Plant length (Plant breadth)	38.53±0.38 a	36.22±1.2 b		Plant width	44.53± 0.53 a	41.78± 1.89 b
Plant width	44.58±0.45 a	42.18±1.17 b		Numbers of leaves	13.39± 0.41 a	11.74± 0.54 b
Numbers of leaves	13.35±0.33 a	11.84±0.40 b		Leaf shape	2.97± 0.03 a	2.69± 0.13 b
Fleshy tuber width	8.41±0.3 a	7.10±0.49 b		Leaf color	3.00± 0.00 a	3.15± 0.15 b
Flower length	12.47±0.18 a	13.90±0.54 b		Exterior color of above-ground tuber	2.7± 0.15 a	4.00± 0.60 b
Flower width	10.38±0.14 a	11.48±0.45 b		Cross section shape of petiole	1.59± 0.06 a	2.00± 0.11 b
Sepal length	6.15±0.06 a	6.49±0.15 b
Petal length	8.86±0.14 a	9.88±0.33 b
Petal width	4.88±0.08 a	5.62±0.26 b
Pistil width	0.92±0.01 a	0.98±0.03 b
Cotyledon color	3.00±0.00 a	3.04±0.04 b
Leaf shape	3.00±0.04 a	2.82±0.07 b
Leaf color	3.02±0.01 a	3.32±0.12 b
Scar on tuber shoulder	2.08±0.06 a	2.44±0.15 b
Cross section shape of petiole	1.75±0.06 a	2.04±0.1 b
Different letters indicate significant differences (p < 0.05) between two groups by Wilcoxon rank sum test.
