# Supplementary material for: Genetic Diversity and Primary Core Collection Construction of Turnip (Brassica rapa L. ssp. rapifera Matzg) Landraces in Tibet Revealed via Morphological and SSR Markers
Source: MDPI journal article supplement (doi:10.3390/agronomy11101901), 2021-09-22
Supplement: s1 [file s1 › Table S8.xlsx]

## Sheet: Sheet1
Table S8. Varieties structure and their geographical origin in P1 and P2
Collected region	Population
	P1	P2
Total	140	31
Tibet，China	105	13
Japan	14	11
Anhui,China	1	1
Hebei,China	0	2
Zhejiang,China	2	1
Neimengggu,China	0	1
V01,China	8	2
Beijing,China	2	0
Qinghai,China	2	0
Europe	4	0
Korea (Chinese cabbage)	1	0
Chinese cabbage	1	0
