# Supplementary material for: Genetic Diversity and Primary Core Collection Construction of Turnip (Brassica rapa L. ssp. rapifera Matzg) Landraces in Tibet Revealed via Morphological and SSR Markers
Source: MDPI journal article supplement (doi:10.3390/agronomy11101901), 2021-09-22
Supplement: s1 [file s1 › Table S9..xlsx]

## Sheet: Sheet1
Table S9 Consruction of primary core collection based on different sampling scales
0.2	0.15	0.1
177-2	177-2	177-3
177-3	177-3	177-19
177-7	177-19	177-29
177-12	177-21	177-31
177-19	177-29	177-34
177-21	177-31	177-37
177-29	177-34	177-43
177-31	177-37	177-55
177-34	177-40	177-62
177-37	177-43	177-68
177-40	177-52	177-92
177-43	177-55	177-95
177-44	177-62	177-99
177-52	177-68	177-108
177-54	177-73	177-122
177-55	177-85	177-136
177-62	177-92	177-151
177-68	177-95	177-156
177-70	177-99	177-168
177-73	177-108
177-85	177-122
177-92	177-136
177-95	177-146
177-99	177-151
177-108	177-156
177-113	177-168
177-122
177-136
177-138
177-140
177-146
177-151
177-156
177-168
