# Supplementary material for: Genetic Diversity and Primary Core Collection Construction of Turnip (Brassica rapa L. ssp. rapifera Matzg) Landraces in Tibet Revealed via Morphological and SSR Markers
Source: MDPI journal article supplement (doi:10.3390/agronomy11101901), 2021-09-22
Supplement: s1 [file s1 › Table S10.xlsx]

## Sheet: Sheet1
Table S10.Eigen value and comulative contributive percentage for the initial population and pre-core collection
	Initial population				Pre-core collection
Component	Eigen Value	Contributive Percentage(%)	Comulative Contributive Percentage(%)		Eigen Value	Contributive Percentage(%)	Comulative Contributive Percentage(%)
1	5.32	14	14		10.1	21	21
2	3.23	8	22		5.85	12	33
3	2.5	7	29		5.54	12	45
4	2.24	6	35		4.12	9	53
5	2.17	6	40		3.21	7	60
6	2.1	5	46		2.95	6	66
7	2.03	5	51		2.25	5	71
8	2.01	5	57		2.1	4	75
