# Supplementary figures and images for: Genetic Diversity and Primary Core Collection Construction of Turnip (Brassica rapa L. ssp. rapifera Matzg) Landraces in Tibet Revealed via Morphological and SSR Markers
Source: MDPI journal article supplement (doi:10.3390/agronomy11101901), 2021-09-22

Figure S1. Morphological diversity of partial turnip varieties (overground and underground)

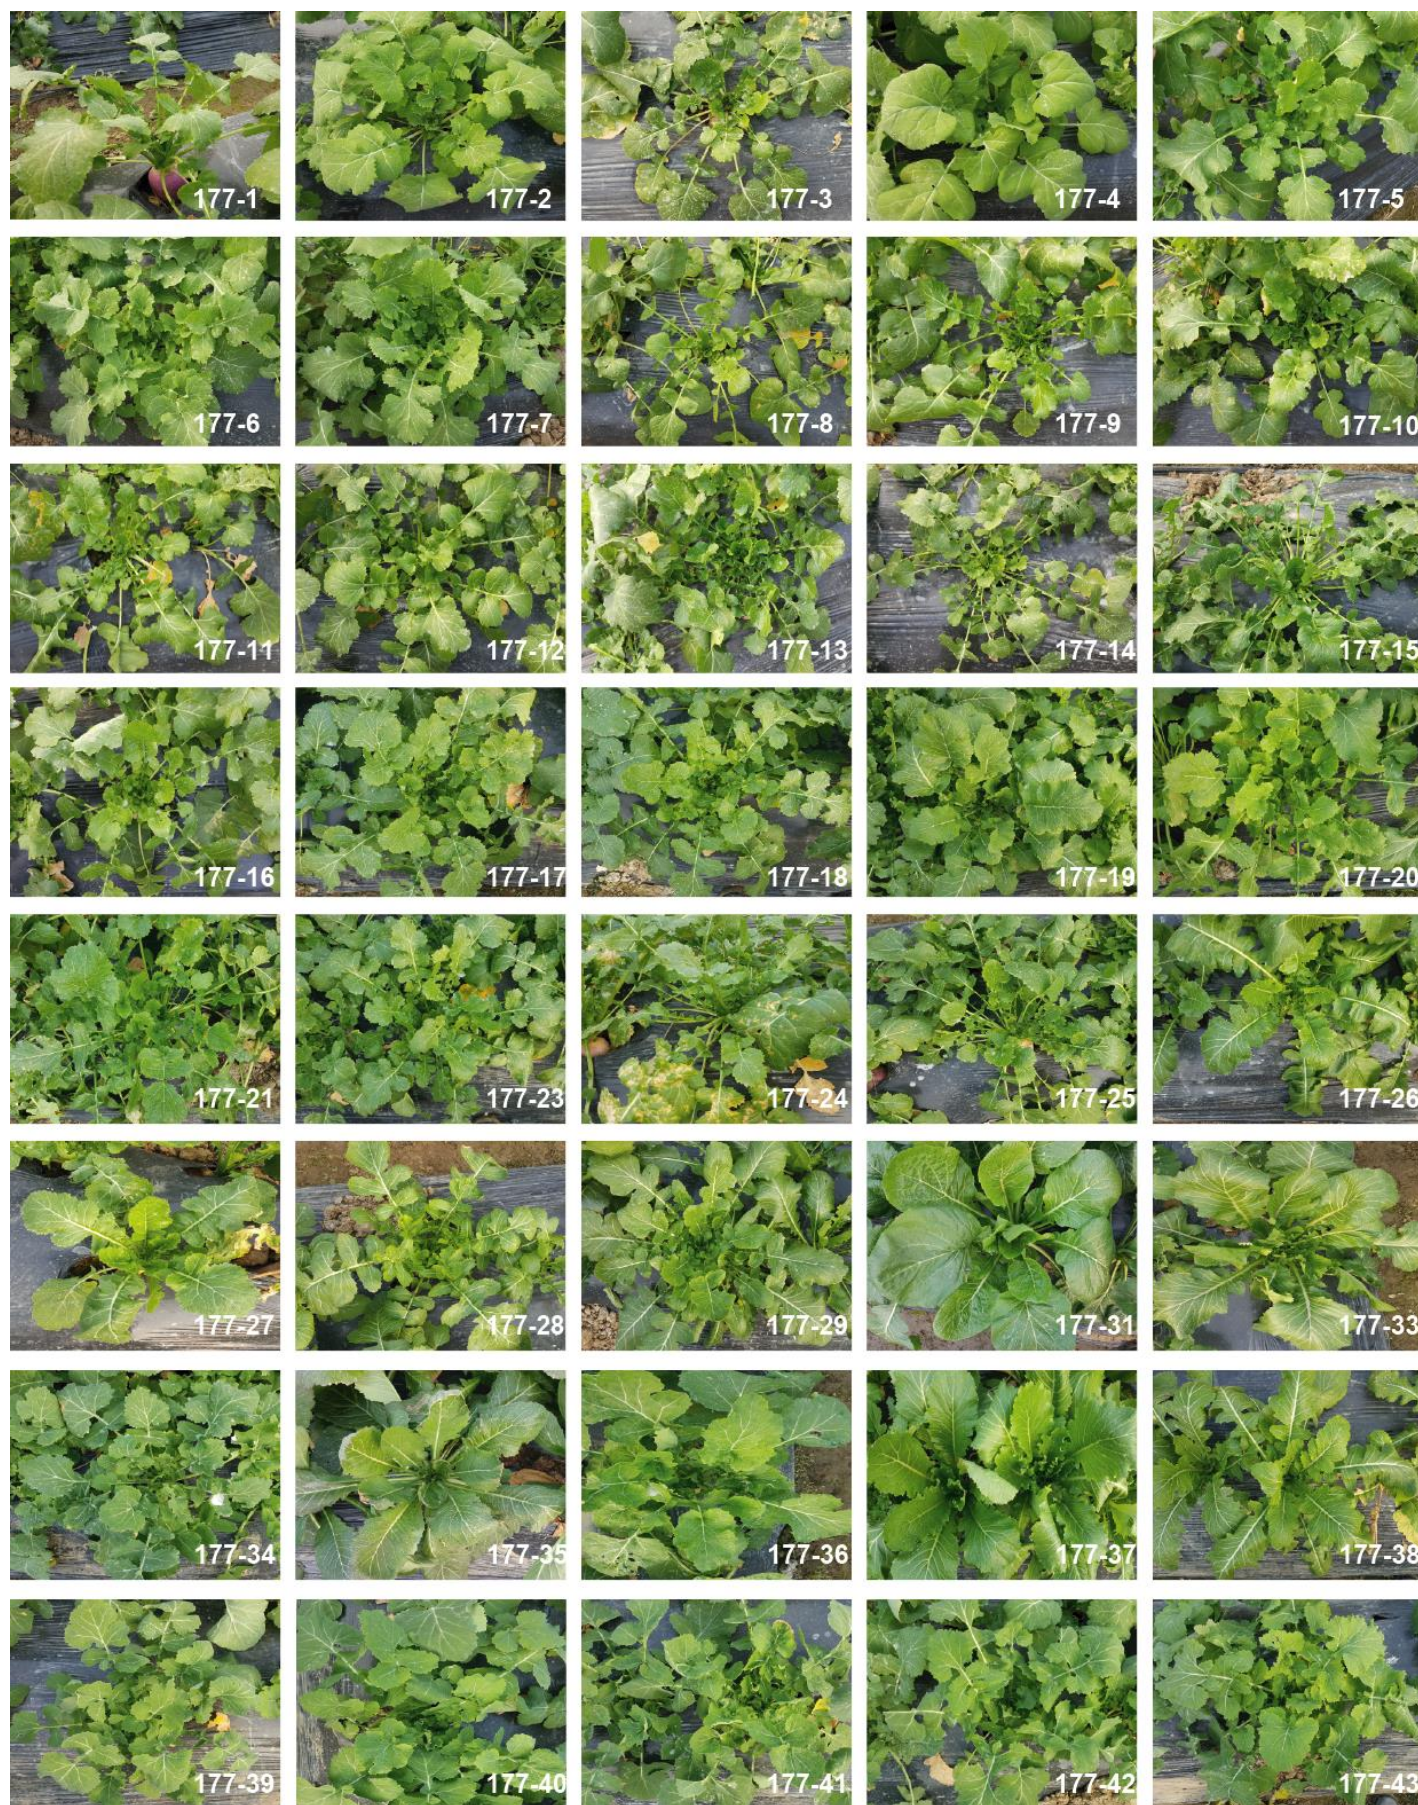



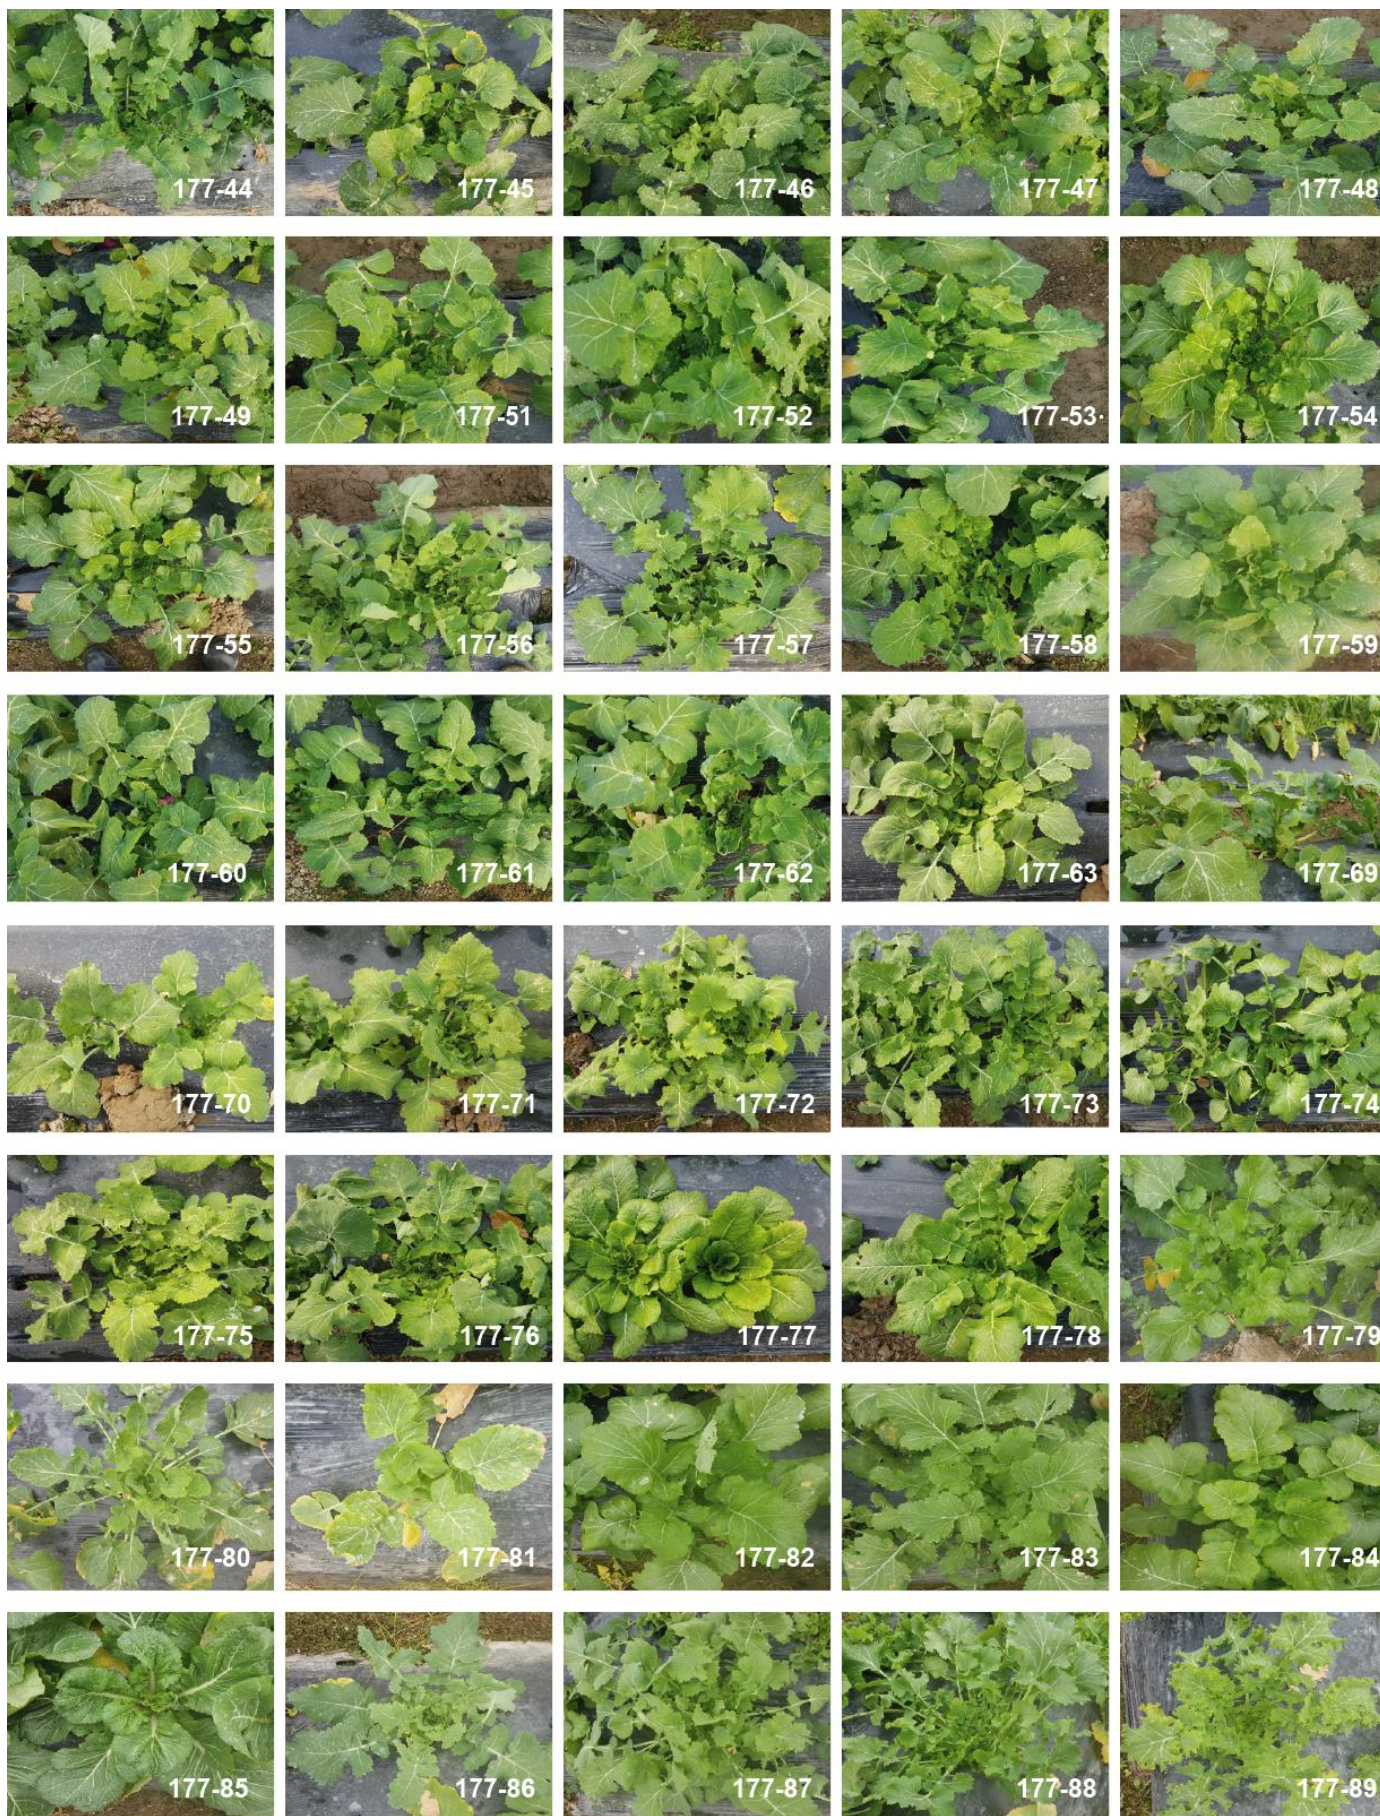



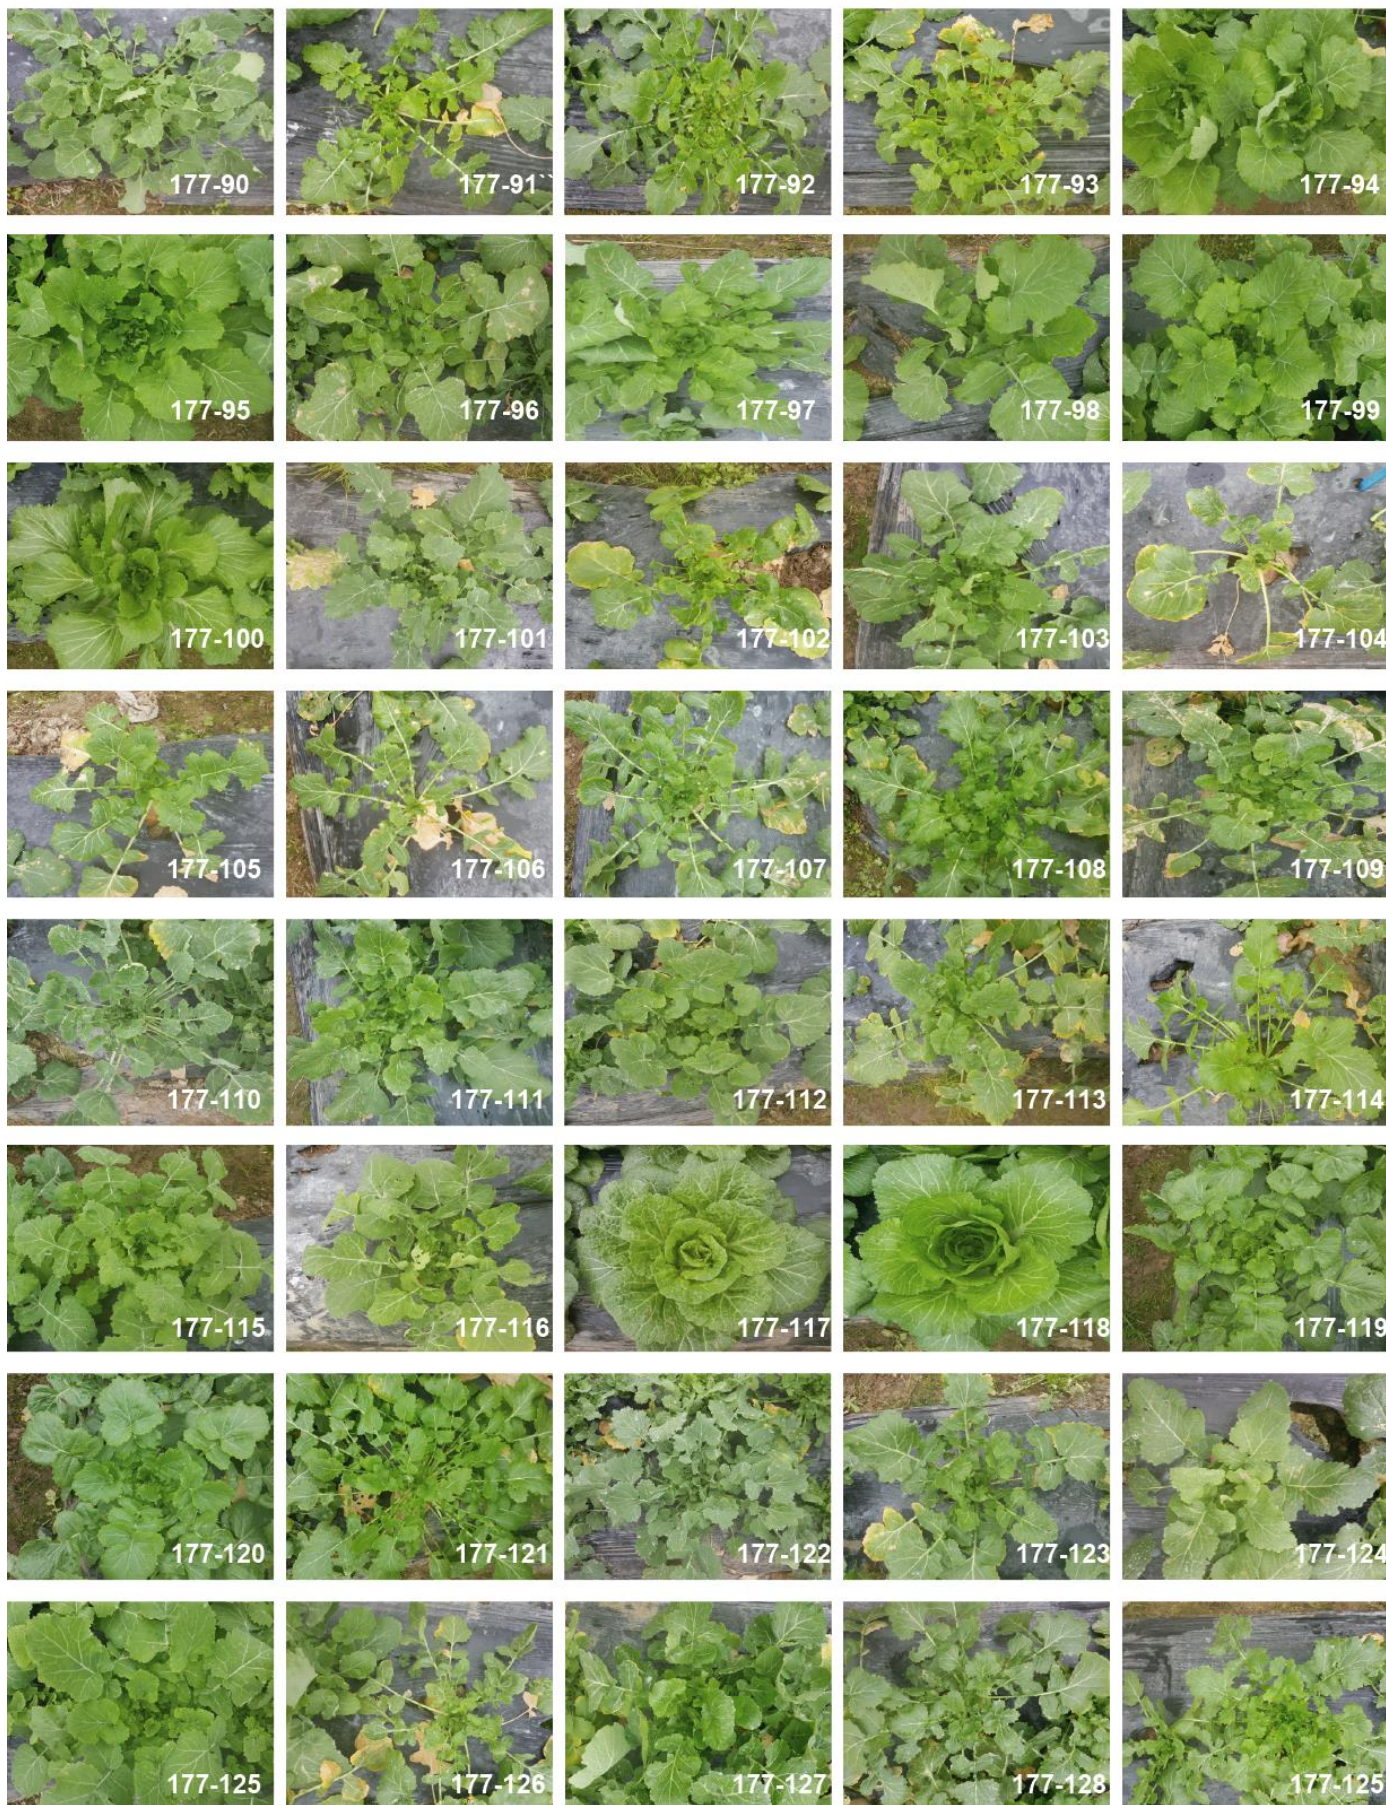



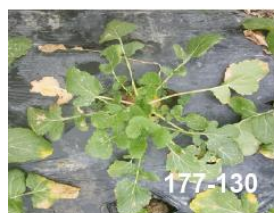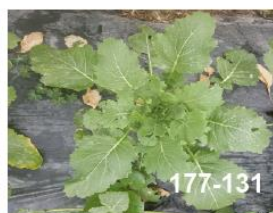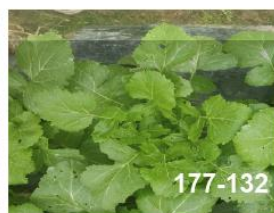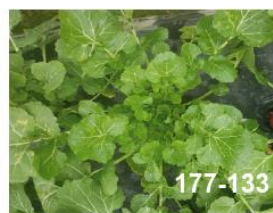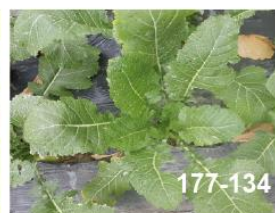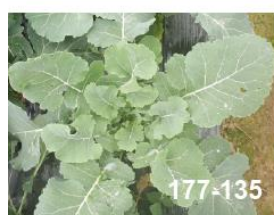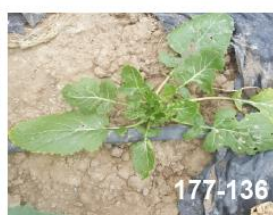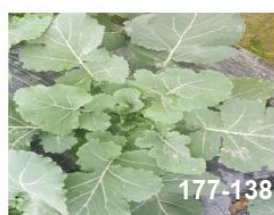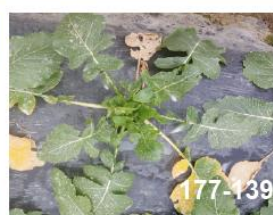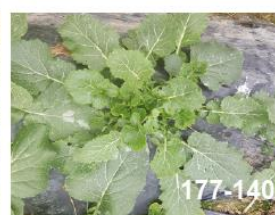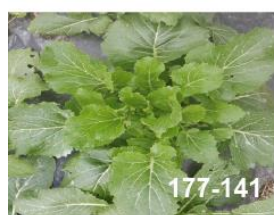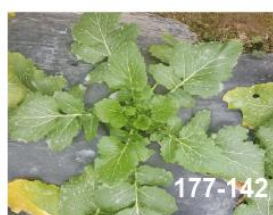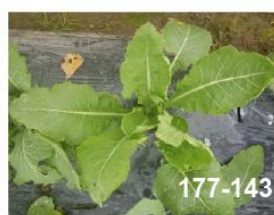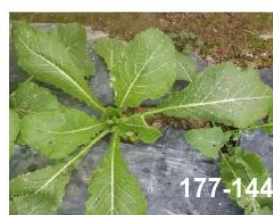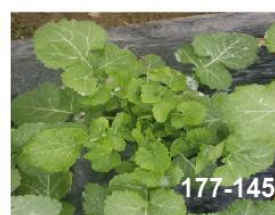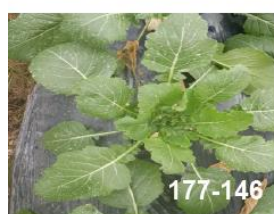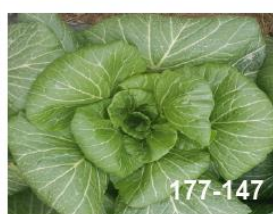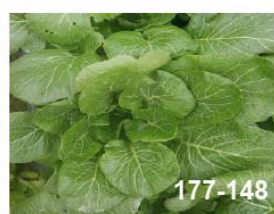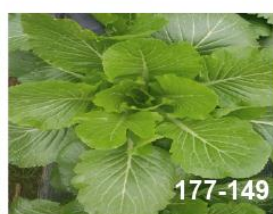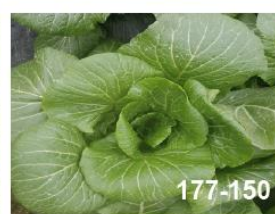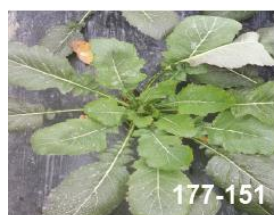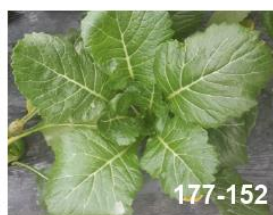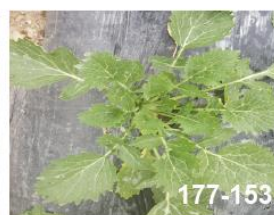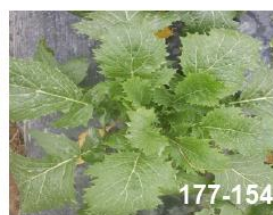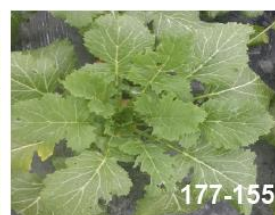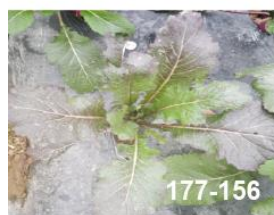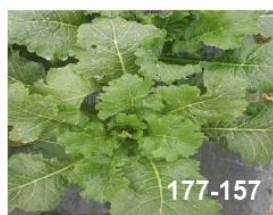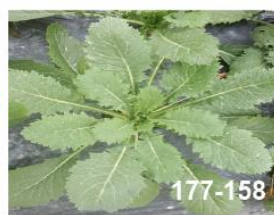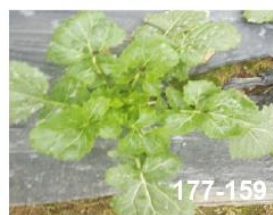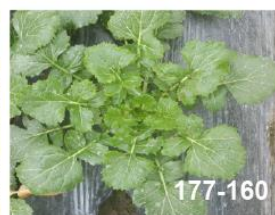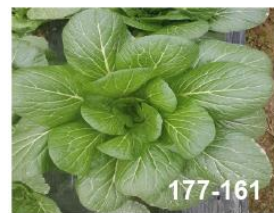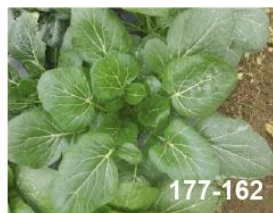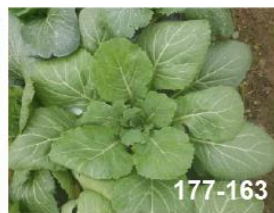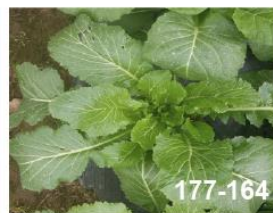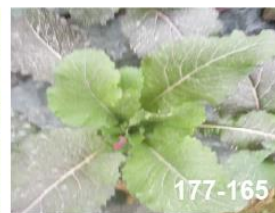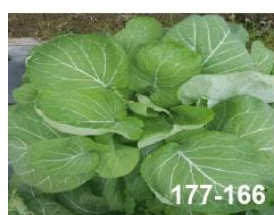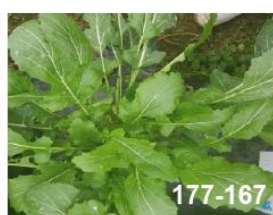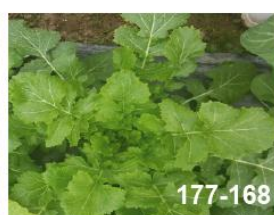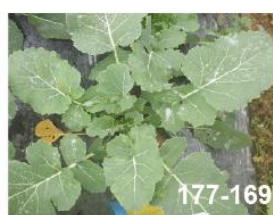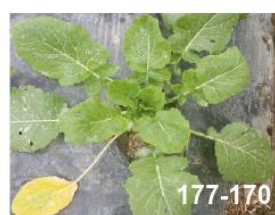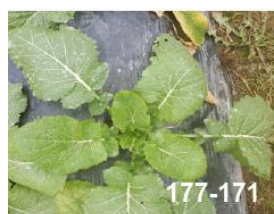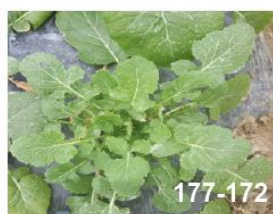



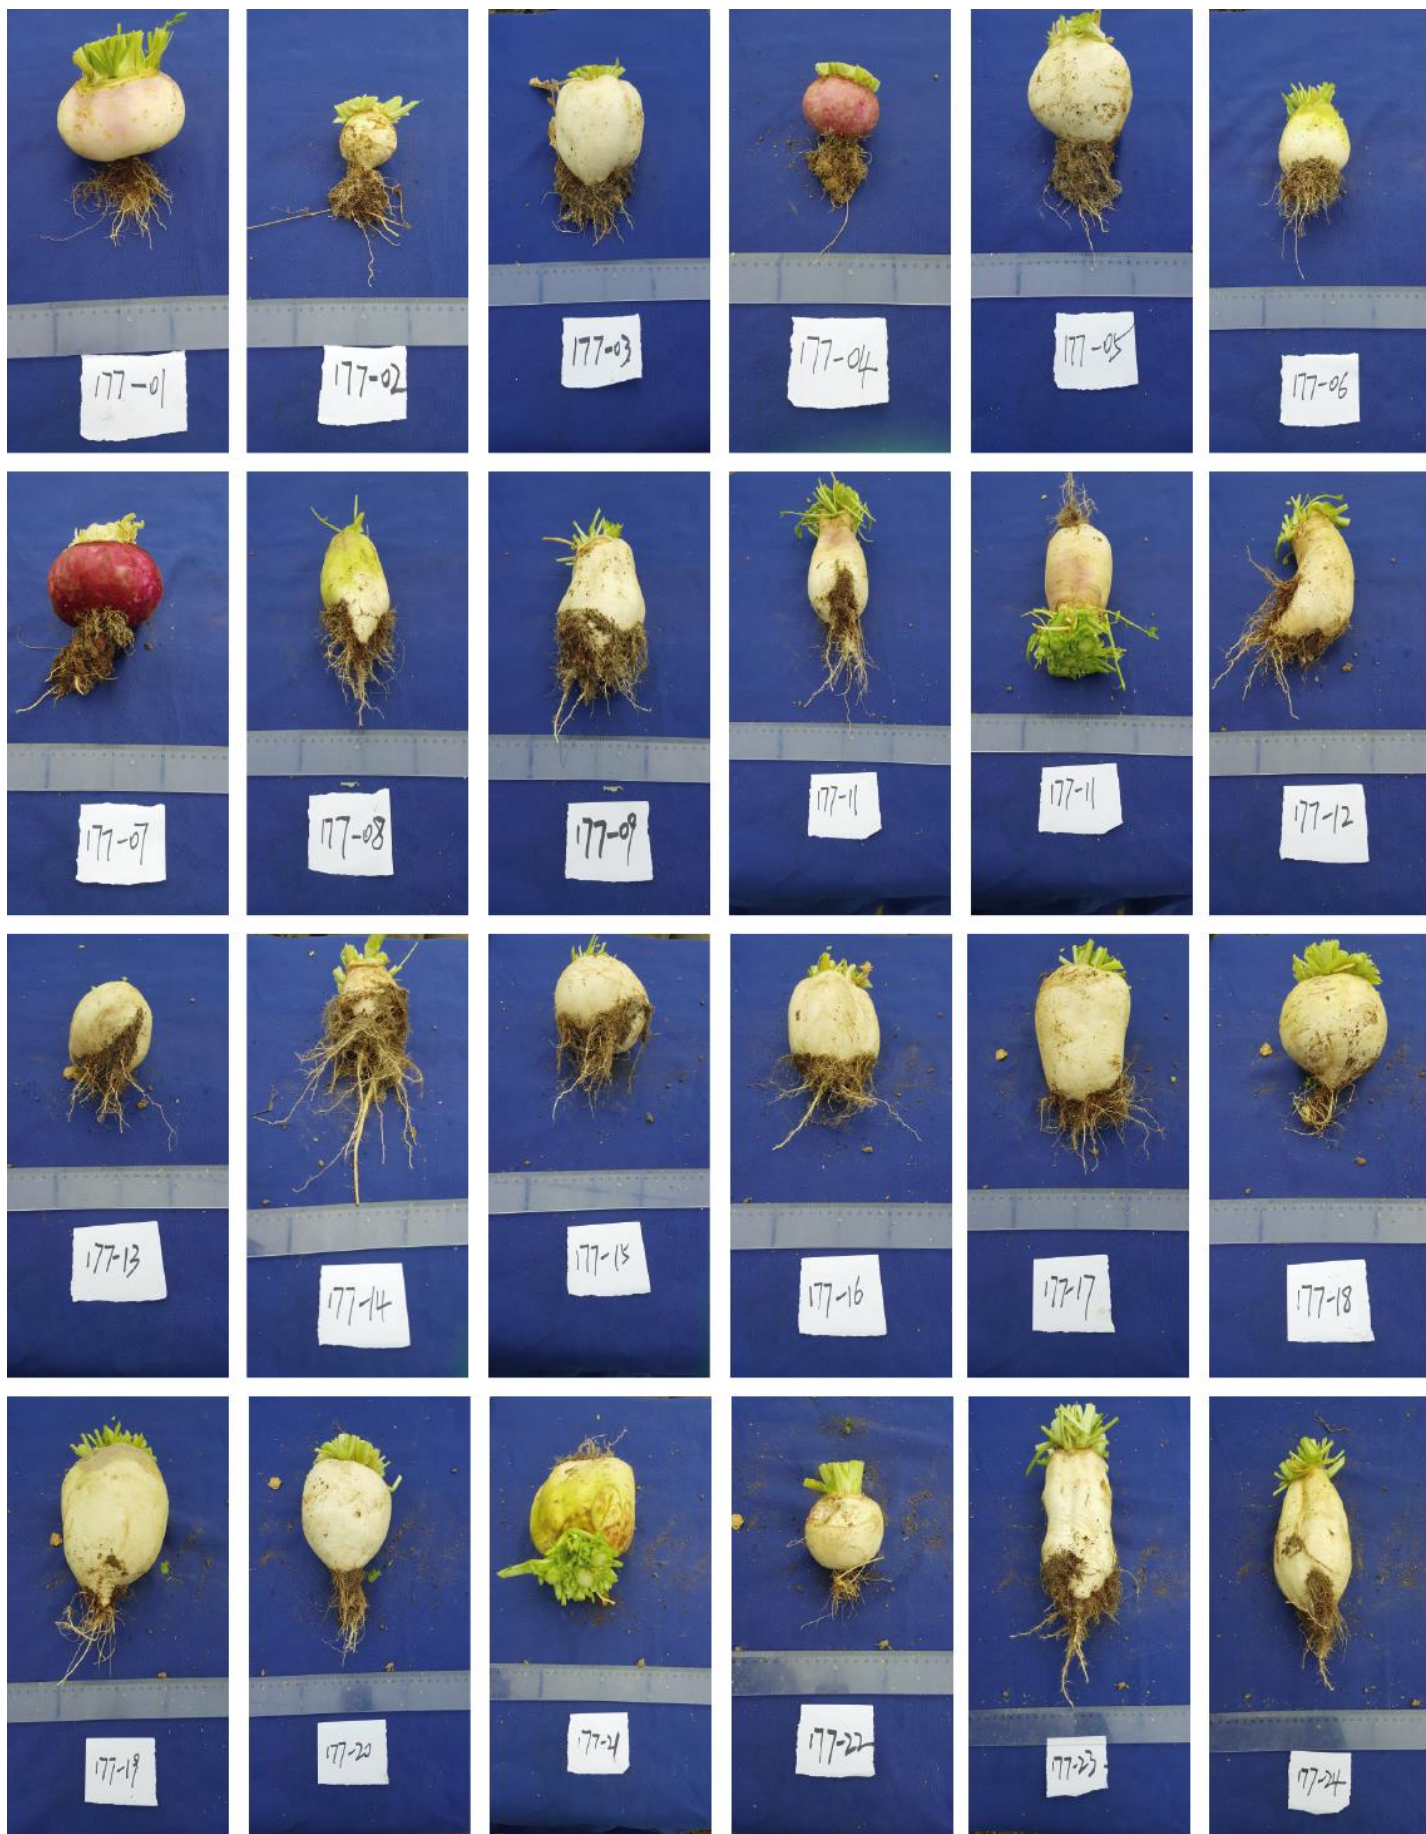



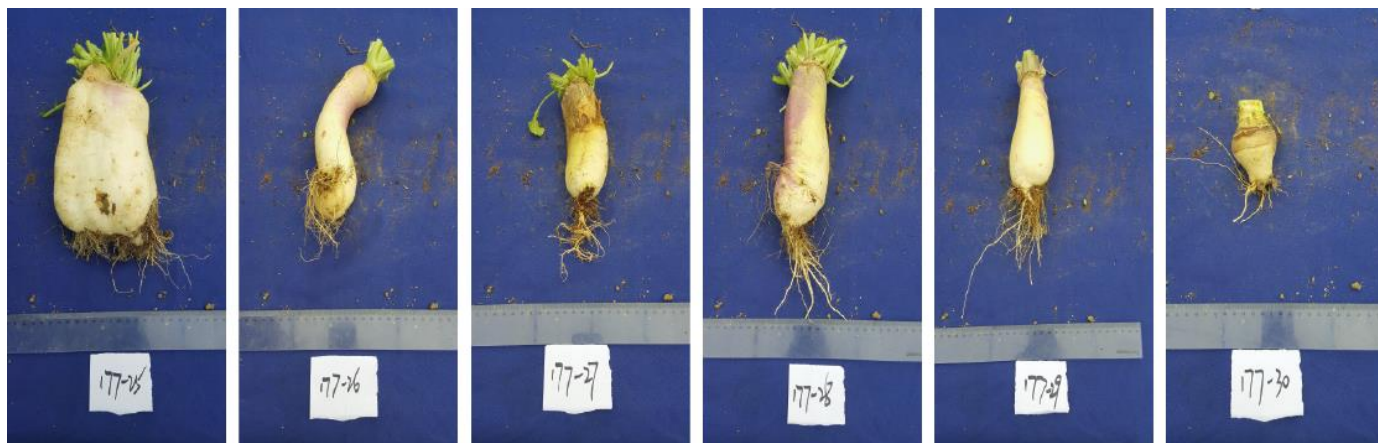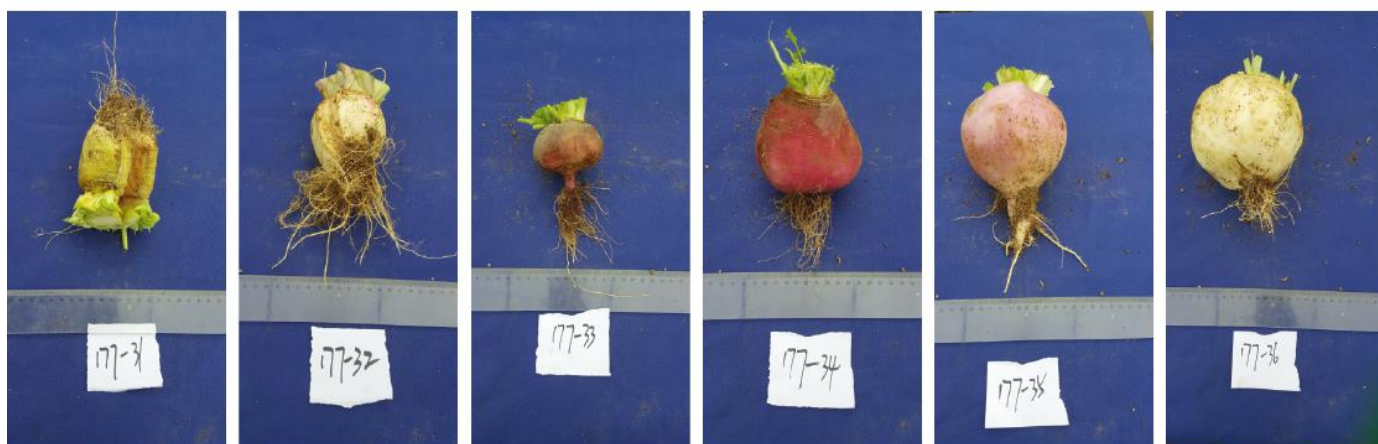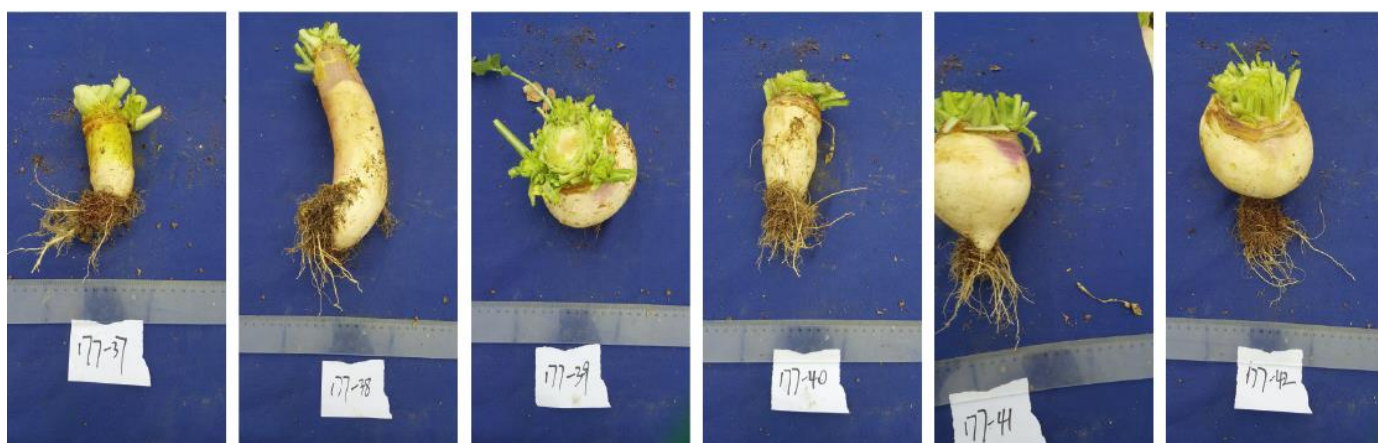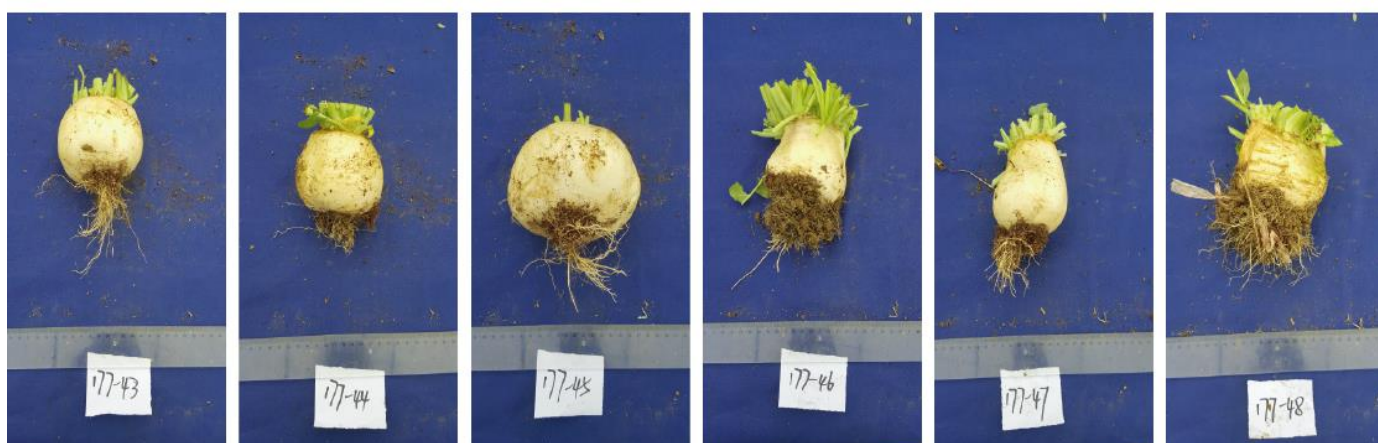



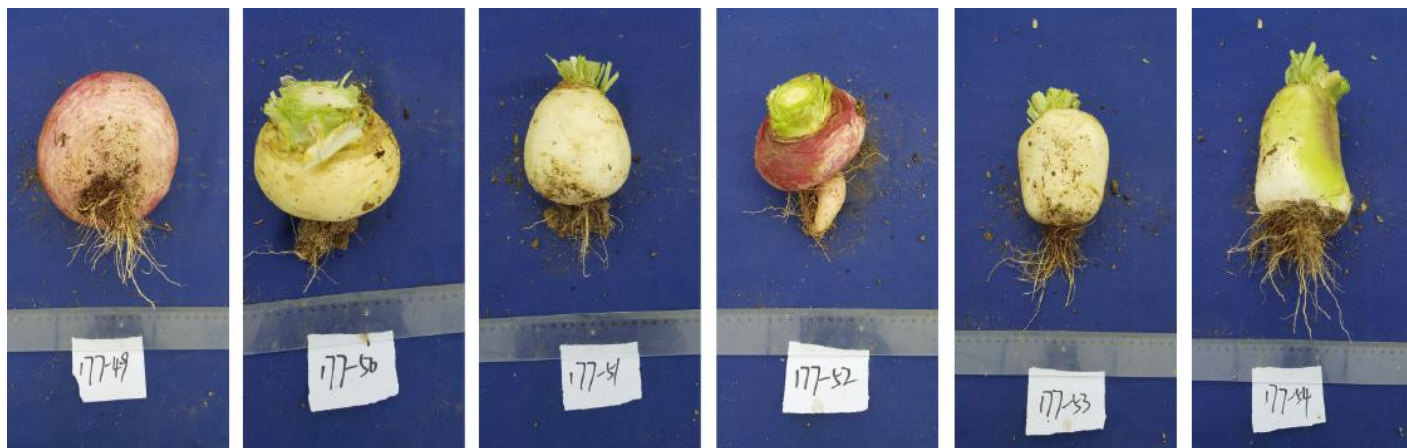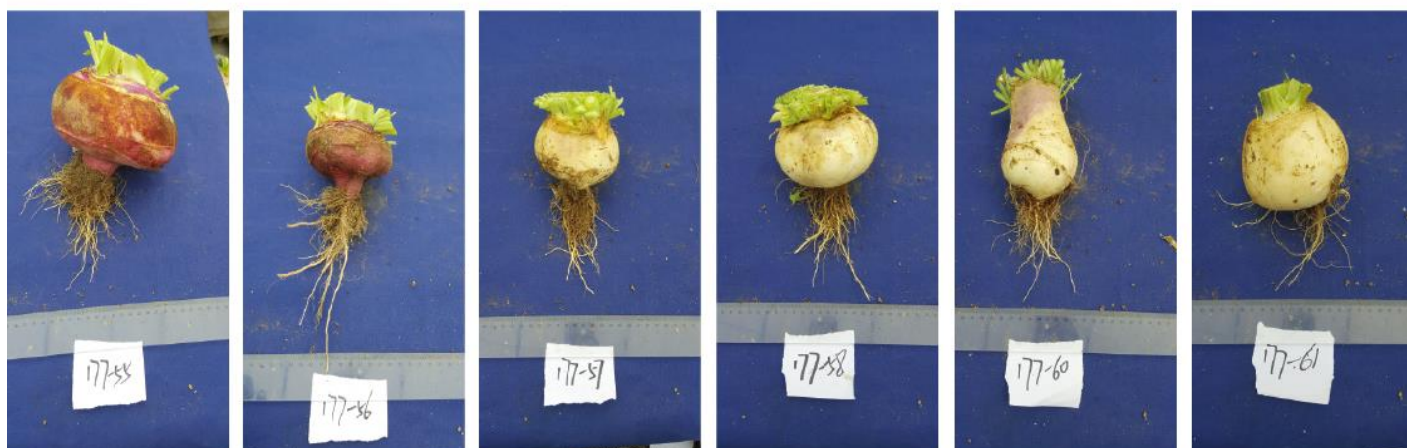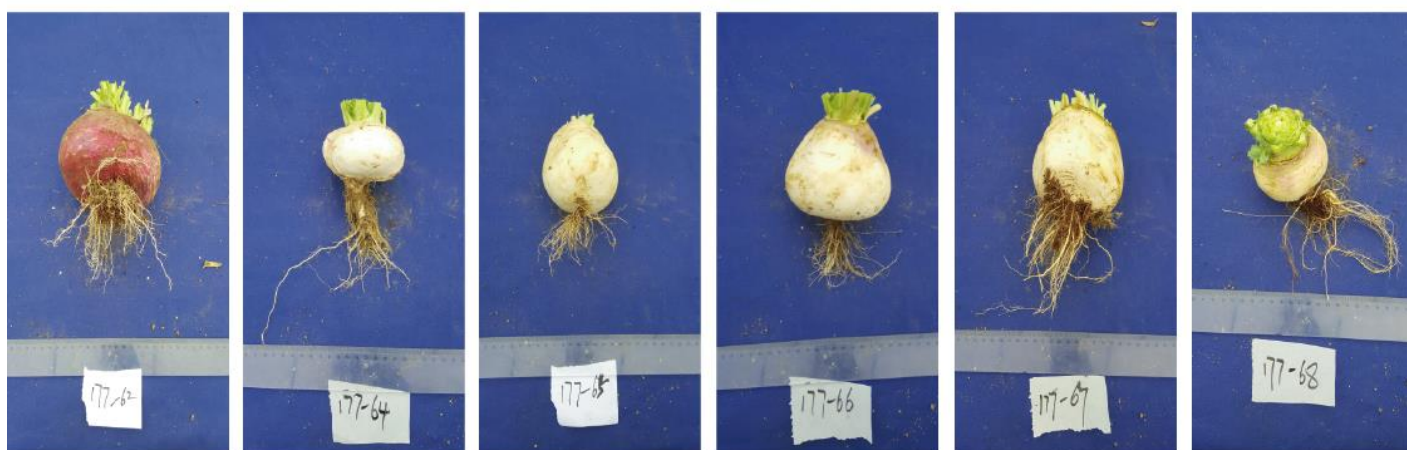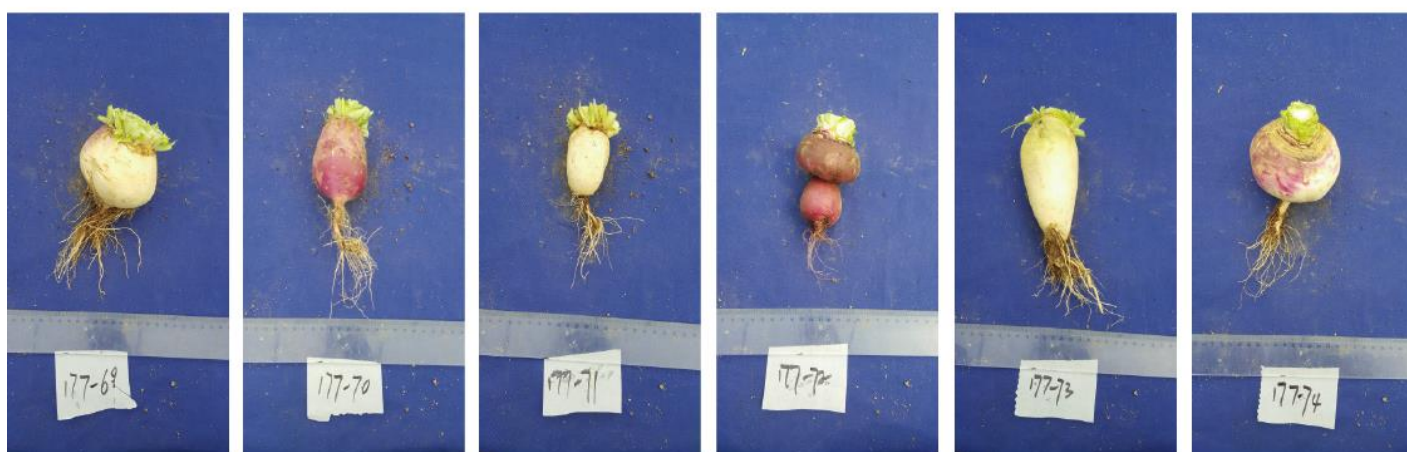



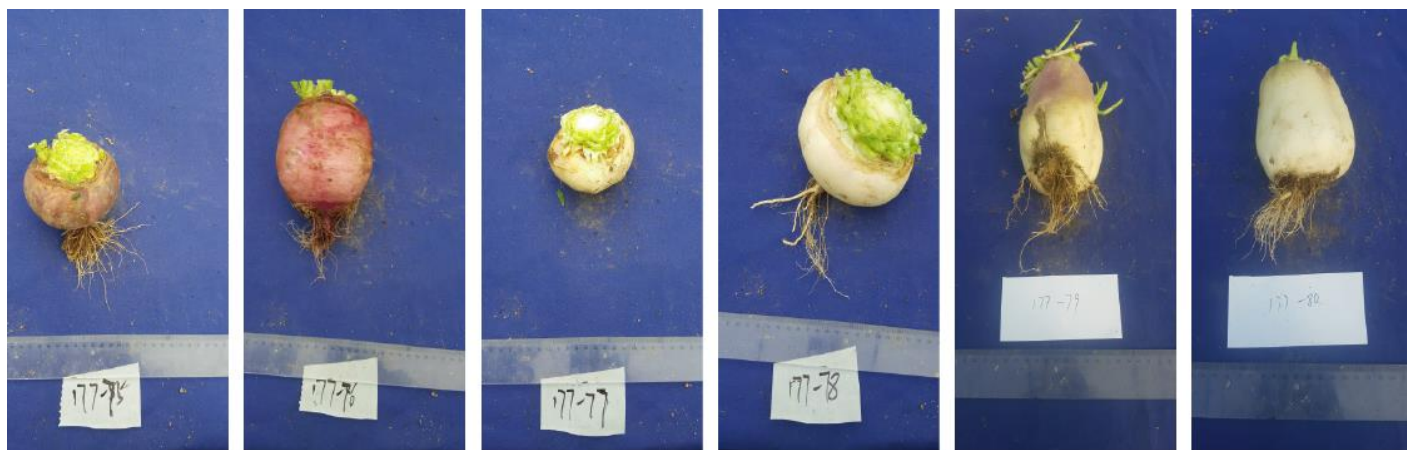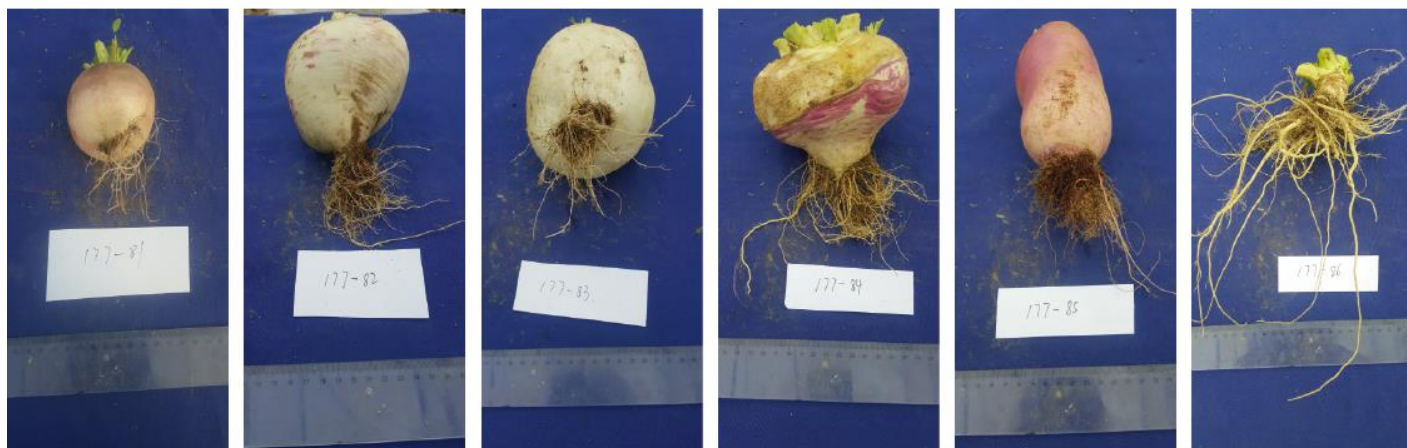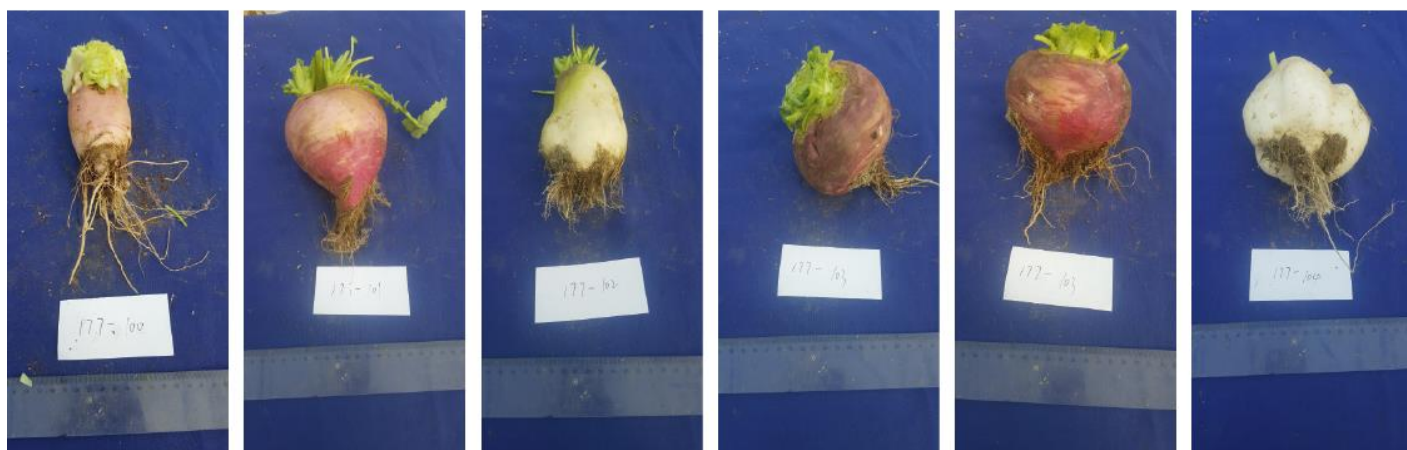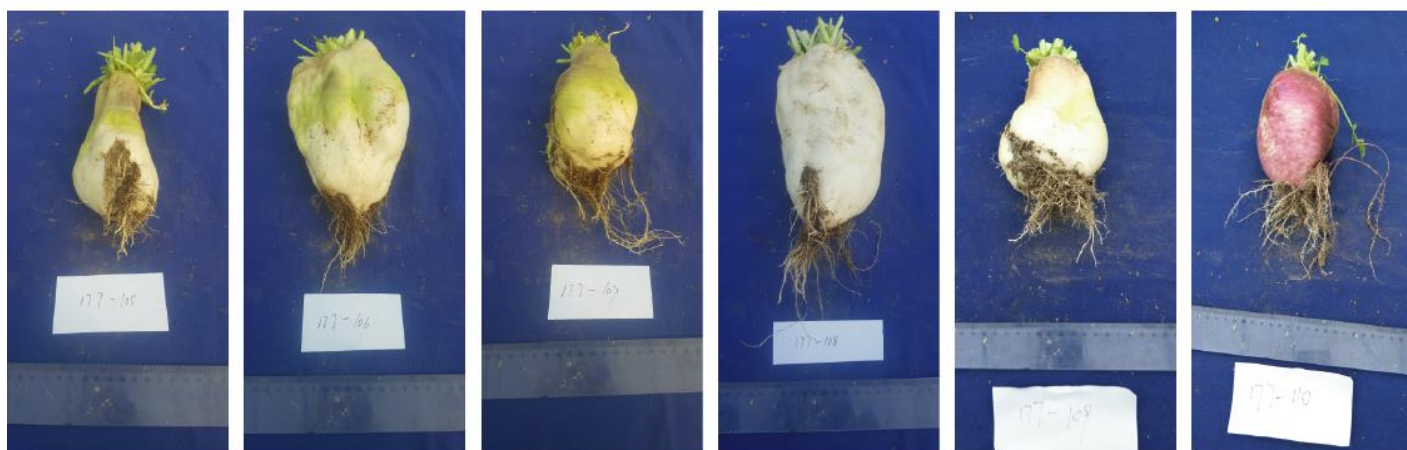



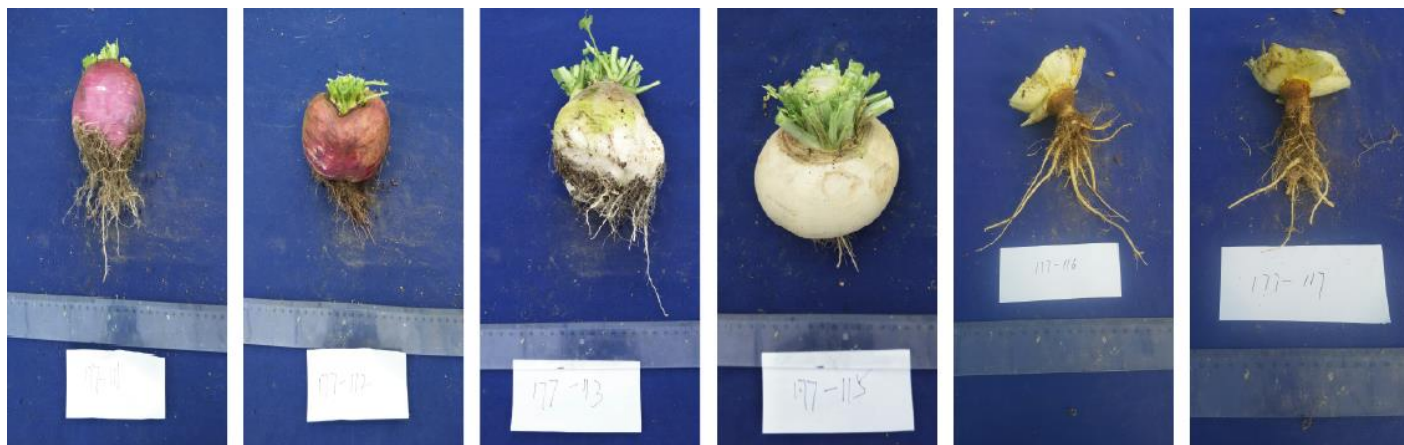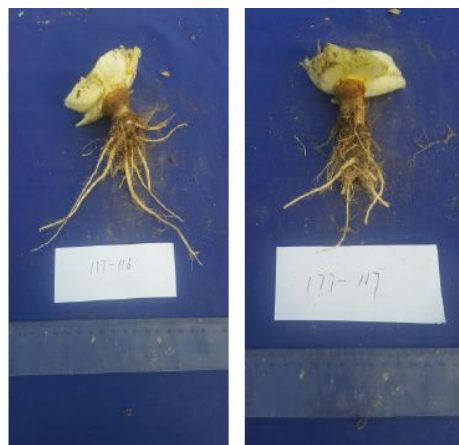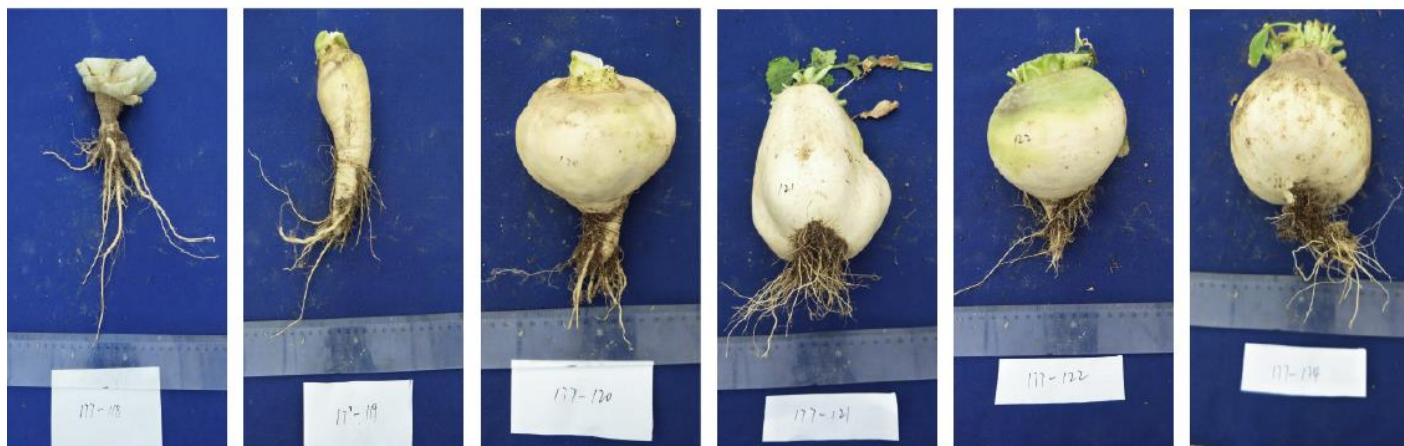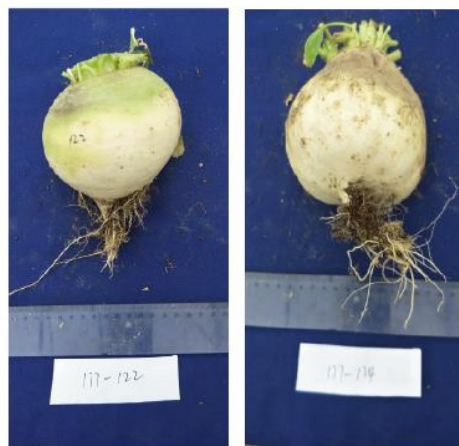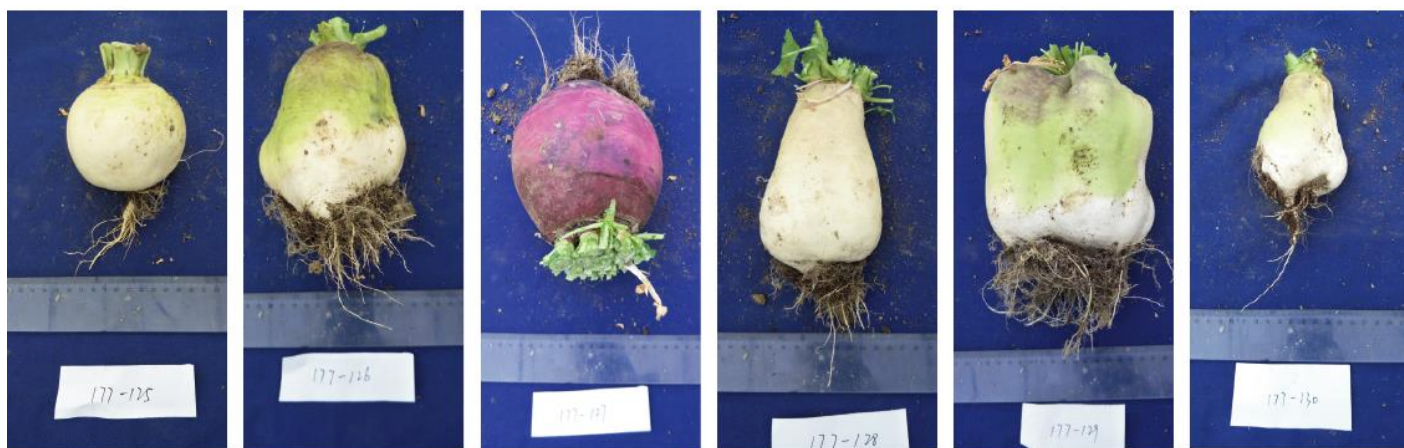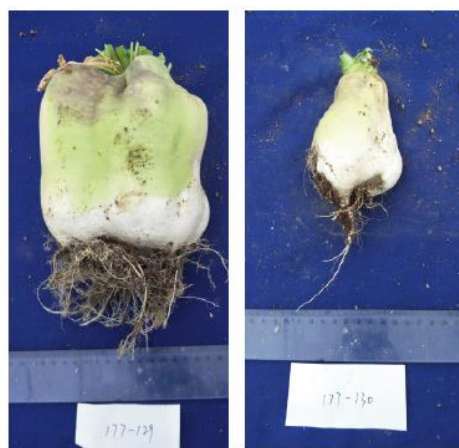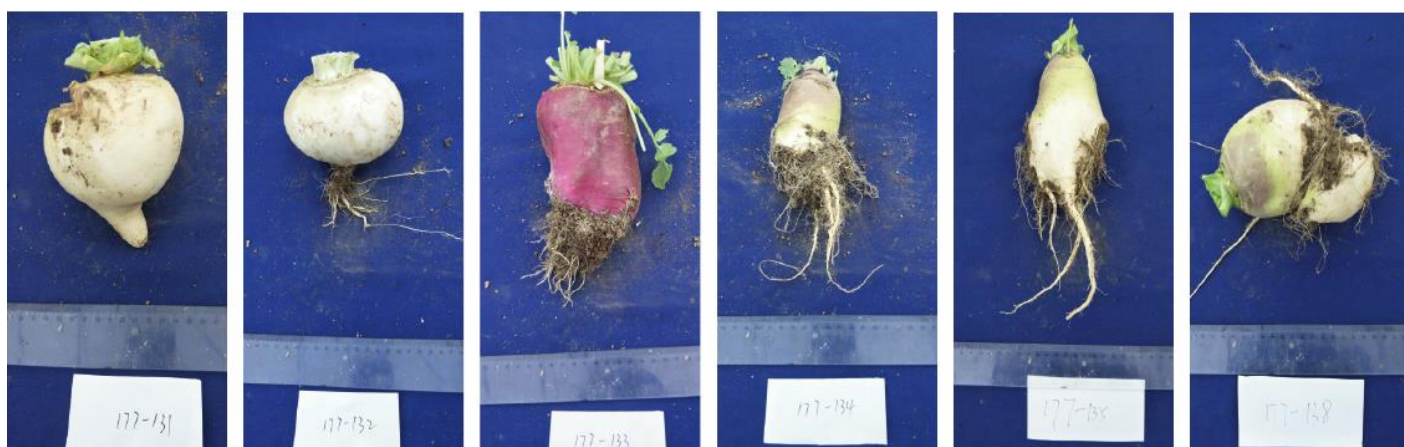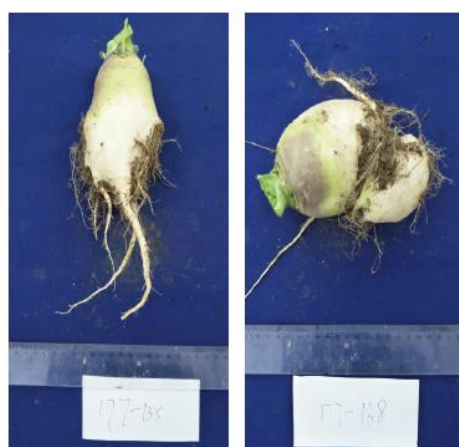



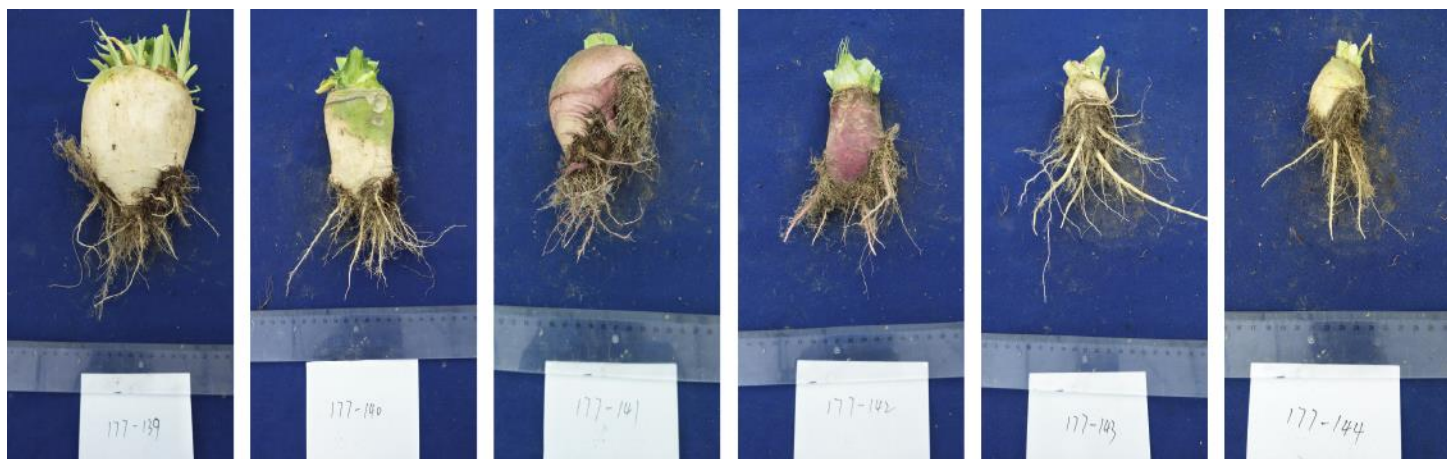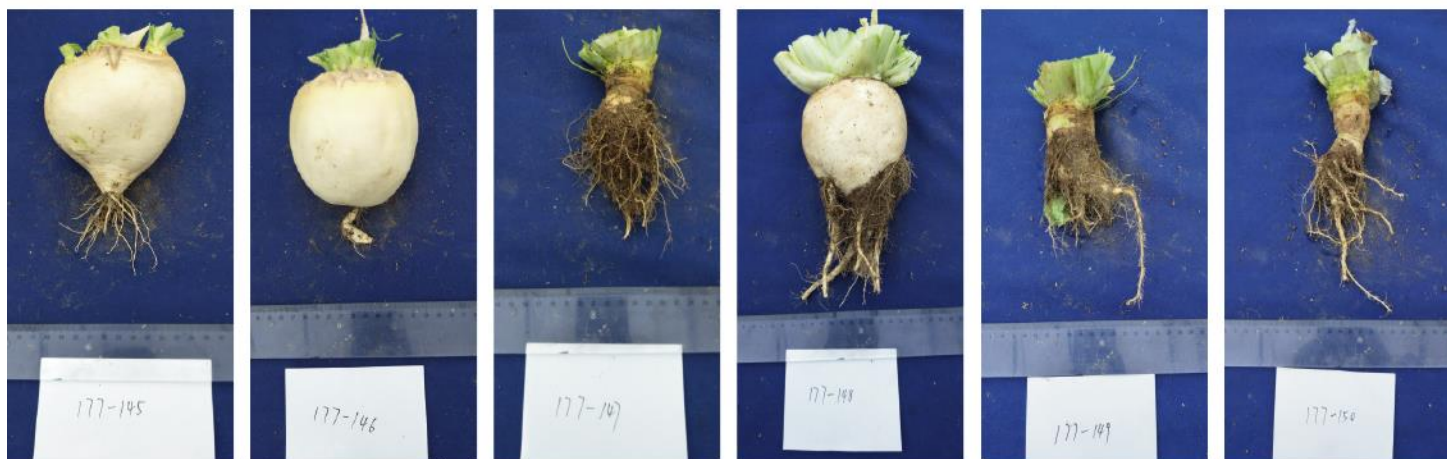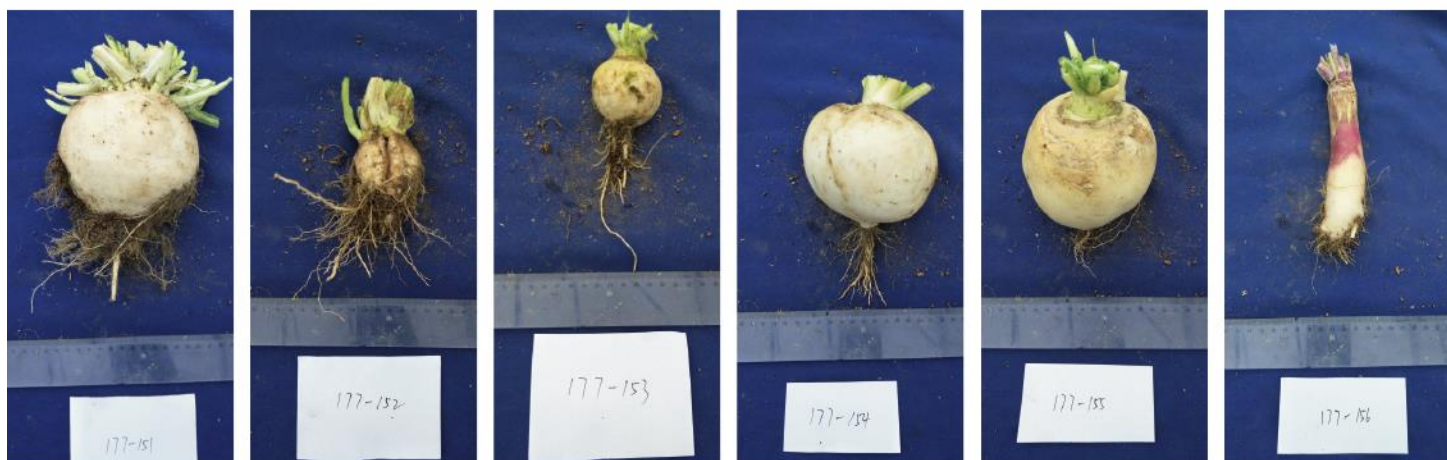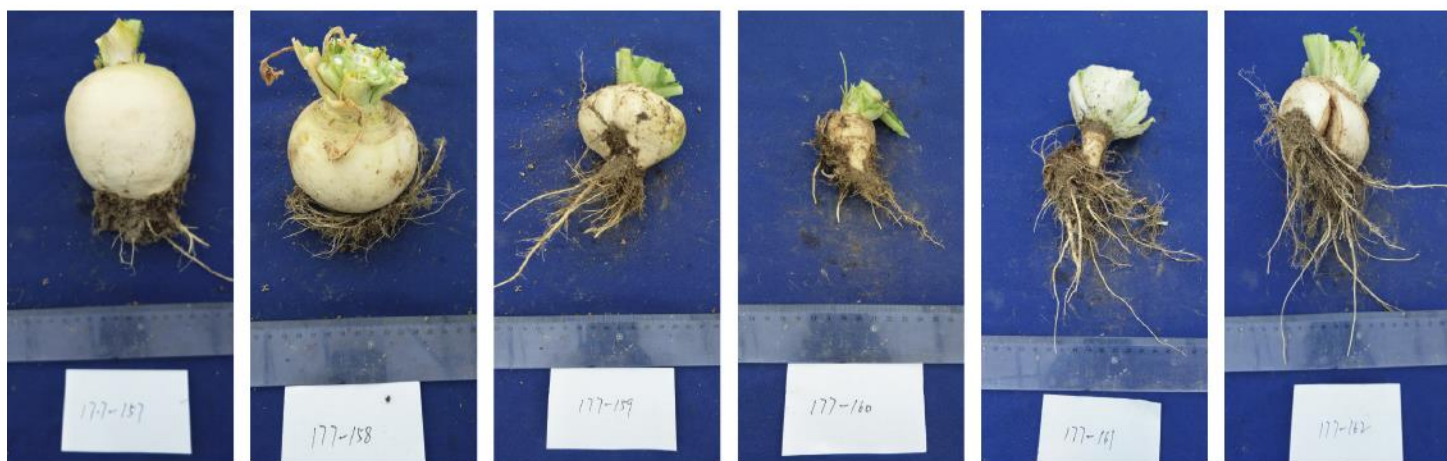



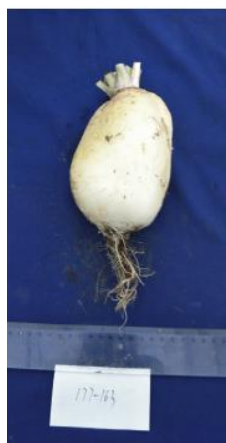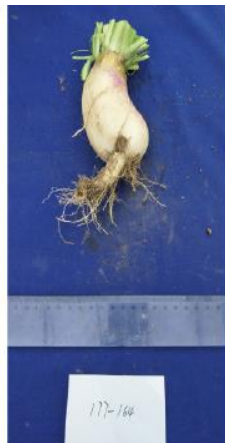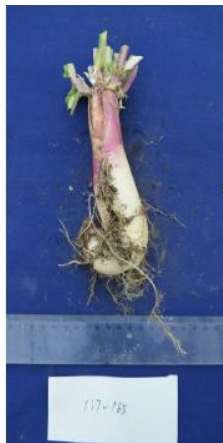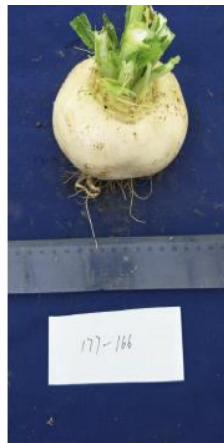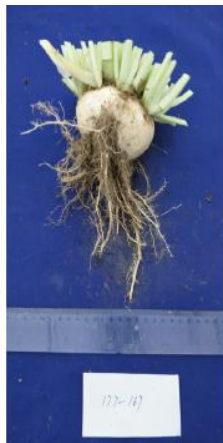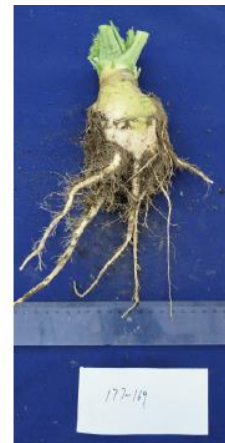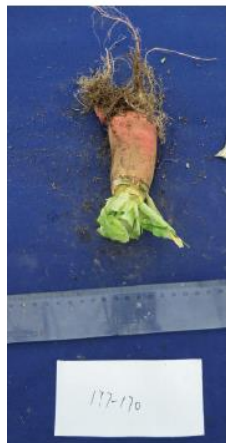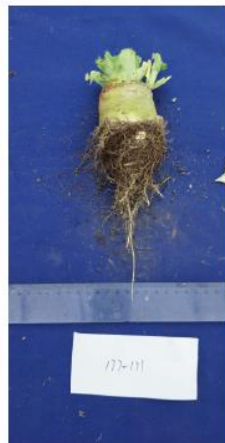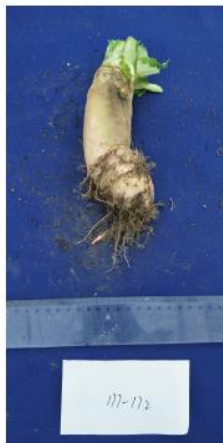

Supplement: s1 [file s1]
